Endogenous MPK-1 expression and biomarker activity

1 **Nuclear translocation of tagged endogenous ERK/MPK-1 MAP Kinase denotes a subset of**  
2 **activation events in *C. elegans* development**

3

4 Neal R. Rasmussen<sup>1</sup>, David J. Reiner<sup>1</sup>

5 <sup>1</sup>Institute of Biosciences and Technology, College of Medicine, Texas A&M Health Science

6 Center, Texas A&M University, Houston, TX, 77030, USA

7

8

9

10

11

12

13

14

15

16 Correspondence:

17 Institute of Biosciences and Technology

18 College of Medicine

19 Texas A&M Health Science Center

20 Texas A&M University

21 2121 W. Holcombe Blvd.

22 Houston, TX 77030

23 (713) 677-7416

24 dreiner@tamu.edu

25

## Endogenous MPK-1 expression and biomarker activity

### 26 **ABSTRACT**

27 The extracellular signal-regulated kinase (ERK) MAP kinase is utilized downstream of  
28 Ras>Raf>MEK signaling to control activation of a wide array of targets. Activation of ERK is  
29 elevated in Ras-driven tumors and RASopathies, and is thus a target for pharmacological  
30 inhibition. Regulatory mechanisms of ERK activation has been studied extensively *in vitro* and in  
31 cultured cells but little in living animals. We used CRISPR to tag the 3' end of the *C. elegans*  
32 ERK-encoding gene, *mpk-1*. Endogenous MPK-1 protein is ubiquitously expressed with elevated  
33 expression in certain tissues. We detected cytosol-to-nuclear translocation of MPK-1 in maturing  
34 oocytes and hence validated nuclear translocation as a reporter of some activation events. During  
35 developmental patterning of the six vulval precursor cells, MPK-1 is necessary and sufficient for  
36 the central cell, P6.p, to assume 1° fate. We observed MPK-1 to be recruited to the nuclei of all six  
37 VPCs in a temporal and concentration gradient centered on P6.p. This observation contrasts with  
38 previous results using the ERK-nKTR reporter of substrate activation, raising questions about  
39 mechanisms and indicators of MPK-1 activation. This system and reagent promise to provide  
40 critical insights into regulation of MPK-1 activation within a complex intercellular signaling  
41 network.

42

## Endogenous MPK-1 expression and biomarker activity

### 43 INTRODUCTION

44 The mitogen-activated protein kinase (MAPK) family regulates a diverse series of cellular  
45 functions including cell proliferation, migration, and differentiation (Kolch 2005). The most well-  
46 known are the conventional MAPKs p38, JNK (c-Jun N-terminal kinase), and ERK (extracellular  
47 signal-regulated kinase), all of which exhibit high degrees of conservation across metazoans  
48 (Cargnello and Roux 2011). Early work in *Drosophila* and *C. elegans* identified orthologs of ERK  
49 – rolled and MPK-1, respectively – as the terminal kinases of the Ras>Raf>MEK>ERK signaling  
50 cascade (Biggs et al. 1994; Wu and Han 1994; Lackner et al. 1994). The role of MPK-1 in *C.*  
51 *elegans* development was first uncovered in the vulval precursor cells (VPCs) as part of the  
52 Ras/LET-60 signaling cascade promoting 1° fate. ERK/MPK-1 was shown to be both necessary  
53 and sufficient for proper induction of 1° fate within the VPCs (Lackner and Kim 1998).  
54 ERK/MPK-1 is also a key player in other *C. elegans* tissues, including induction of excretory duct  
55 cell fate, multiple developmental events during germline proliferation, roles in nervous system  
56 function, and immune response to pathogenic bacteria (Arur et al. 2009; Church et al. 1995;  
57 Nicholas and Hodgkin 2004; Lackner and Kim 1998).

58 The ERK MAP kinase cascade has continued to be one of the most well studied signaling  
59 cascades due to its role as a promising pharmacological target for anti-tumor therapies in cancers  
60 with activating mutations in Ras, Raf, or upstream receptor tyrosine kinases (Ryan et al. 2015).  
61 An understanding of ERK and its mechanisms of activation has become essential, as targeted  
62 therapeutics for activated Ras and Raf have currently had limited efficacy and can promote  
63 increased activity in wild-type Raf (Durrant and Morrison 2018; Hatzivassiliou et al. 2010;  
64 Poulidakos et al. 2010).

## Endogenous MPK-1 expression and biomarker activity

65 The ERK signaling module consists of a three-tier kinase cascade with multiple  
66 phosphorylation events and negative feedback loops. Kinase activation of substrates in the linear  
67 activation cascade of Raf, MEK and ERK is largely selective, and thus can generally be considered  
68 a “signaling module”. In contrast, composition among kinases upstream of p38 and JNK is variable  
69 and exhibits significant promiscuity (Krishna and Narang 2008; Chen et al. 2011). The linearity  
70 of the Raf>MEK>ERK cascade contrasts with ERK having a large pool of substrates (~659) and  
71 subsequent signaling outputs (Unal et al. 2017).

72 Upstream MAP2 kinases have the unusual property of being dual specificity kinases: they  
73 phosphorylate paired threonine and tyrosine residues adjacent to consensus docking sequences on  
74 their substrate MAP kinase (Derijard et al. 1995; Lin et al. 1995). To counterbalance activating  
75 phosphorylation of ERK, a series of dual specificity phosphatases (DUSPs) inhibit ERK activity  
76 by dephosphorylating both the phosphorylated threonine and tyrosine residues (Huang and Tan  
77 2012).

78 With ERK serving as the primary downstream signaling branch point, the field has largely  
79 relied on detection of its dual phosphorylation status to assay its activation via immunoblotting or  
80 immunostaining. This approach has revealed significant complexity in the spatial and temporal  
81 expression and activation of ERK. Nuclear translocation of ERK has also been used as indicator  
82 of its activity (Lenormand et al. 1993; Gonzalez et al. 1993), though not in model organisms.  
83 However, as active ERK and its substrates can be found both in the cytoplasm and nucleus, nuclear  
84 translocation must be interpreted with caution (Ajenjo et al. 2004; Yoon and Seger 2006; Unal et  
85 al. 2017). To allow for temporal analyses of ERK, real-time fluorescent reporters of activity like  
86 FRET (Förster resonance energy transfer) and KTR (kinase translocation reporters) have been  
87 developed for both *ex vivo* and *in vivo* contexts (Harvey et al. 2008; Regot et al. 2014; de la Cova



## Endogenous MPK-1 expression and biomarker activity

88 et al. 2017). These improved tools have expanded our understanding of dynamic regulation of  
89 ERK signaling, but we still are still missing a facet of the activation of ERK: detection of  
90 endogenous ERK subcellular localization in real time.

91 In this study we used CRISPR/Cas9-dependent genome editing to insert sequences coding for  
92 a fluorescent::epitope tag into the endogenous *C. elegans mpk-1* gene, resulting in expressed MPK-  
93 1::mKate2<sup>3x</sup>Flag protein. Visualization of endogenous MPK-1 – at the level of the whole animal  
94 and longitudinally throughout development – provides a novel tool to further understand its roles  
95 in signaling and development. This approach validates certain previous observations of MPK-1  
96 expression, localization and activation in *C. elegans*. We observed tagged endogenous MPK-1 to  
97 be broadly expressed in every part of the animal and throughout development. We also detected  
98 consistently elevated expression in tissues in which MPK-1 activity has been described by other  
99 means. In agreement with previous findings, MPK-1 was expressed throughout the germline,  
100 showing brief nuclear localization in the most proximal developing oocyte. However, our approach  
101 also yielded unexpected observations. Upon induction, cytosolic-to-nuclear translocation of MPK-  
102 1 was observed in all six developing vulval precursor cells (VPCs), not just the presumptive 1°  
103 (P6.p) cell, as would have been predicted from an abundance of previous studies. Translocation in  
104 VPCs also demonstrated temporal and concentration gradients, with earliest and strongest  
105 translocation in P6.p, the VPC destined to assume a 1° fate. These unanticipated dynamics suggest  
106 that mechanisms of MPK-1 activation are more complex than previously understood. Taken  
107 together, our findings demonstrate that our tagged endogenous MPK-1 is a tool that reveals novel  
108 insights into MPK-1 regulation and roles in cell signaling complementary to those measuring  
109 phosphorylation or substrate activation.

110

## Endogenous MPK-1 expression and biomarker activity

### 111 MATERIALS AND METHODS

#### 112 *C. elegans handling and genetics*

113 All strains were derived from the wild-type Bristol N2 parent strain and grown under standard  
114 conditions at 20°C unless stated otherwise (Brenner 1974). Nomenclature conforms to that of the  
115 field (Horvitz et al. 1979). All crosses were performed using standard methods, available upon  
116 request. Genotypes of strains used in this study are listed in **Supplementary Table 1**.

117

#### 118 *Plasmids, Generation of CRISPR strains*

119 Details of plasmid constructions are available upon request. Primers used in this study are listed  
120 in **Supplementary Table 2**, plasmids in **Supplementary Table 3**. The *mpk-1(re171[mpk-*  
121 *1::mkate2^SEC^3xFlag])* and *mpk-1(re172[::mKate2^3xFlag])* alleles were generated using the  
122 SEC approach of positive/negative selection for CRISPR inserts (Dickinson et al. 2015). Small  
123 guide RNAs (sgRNAs) are listed in **Supplementary Table 4**. The repair template for *mpk-1* was  
124 generated with primers oNR059, oNR060 and gBlock oNR067 for cloning into plasmid pDD285.  
125 We microinjected a mix of pCFJ104 (10 ng/μl), pNR09 (50 ng/μl), pNR10 (50 ng/μl), pNR11 (10  
126 ng/μl) into N2 animals. Edited animals were identified by resistance to hygromycin (HygR;  
127 5mg/ml in filtered ddH<sub>2</sub>O, added directly to plates) and the Rol phenotype of the *sqt-1(d)* marker,  
128 both contained in the self-excising cassette (SEC). Homozygous animals were viable as this was  
129 C-terminal insertion. Selected animals were subsequently heat-shocked to induce expression of  
130 Cre, also contained in the SEC. Successful removal of the SEC was indicated by loss of the Rol  
131 marker (Dickinson et al. 2015). Triplex PCR detection primers oNR094, oNR095 and oNR096  
132 were used to confirm insertion and to sequence regions of homology subject to homology-directed

## Endogenous MPK-1 expression and biomarker activity

133 repair (HDR). Single and pooled animal genotyping PCR reactions used Taq PCR Master Mix  
134 (Qiagen).

135

### 136 *Fluorescent microscopy (imaging) and quantification of relative nuclear MPK-1 levels in VPCs*

137 For all imaging, animals were mounted live in M9 buffer containing 2% tetramisole on slides with  
138 a 3% agar pad. DIC/Nomarski optics and fluorescence microscopy were captured using a Nikon  
139 A1si confocal microscope with 488, 561nm lasers (**Figs. 2-5; Figs. S1,2**) or CSU-W1 spinning-  
140 disc confocal laser microscope with 488, 561nm lasers and Photometrics Prime BSI camera (**Figs.**  
141 **6, 7; Figs. S3,4**). Slides prepared for the spinning-disc time-lapse captured were sealed with  
142 VALAP to prevent animals from drying out. Captured images were processed using NIS Elements  
143 Advanced research, version 4.40 (Nikon). Additional deconvolution processing was performed on  
144 all time-lapse images within the Nikon Elements software utilizing the 3-D Richardson-Lucy  
145 algorithm over 35 iterations.

146 To determine relative levels of nuclear localization of MPK-1, animals were imaged in 10-  
147 minute intervals 24 hours post synchronization. Following deconvolution (above), fluorescent  
148 intensity measurements for both MPK-1::mKate2 and mNeonGreen::HIS-72 were recorded for  
149 each P4.p-P8.p nucleus using NIS Elements Advanced research, version 4.40 (Nikon) software.  
150 CTNF (corrected total nuclear fluorescence) was calculated by subtracting background  
151 fluorescence. To account for variations, we then divided the MPK-1::mKate2 CTNF intensity by  
152 their corresponding mNeonGreen::HIS-72 intensity. P-values were calculated using ANOVA.

153

### 154 *Immunoblotting*

## Endogenous MPK-1 expression and biomarker activity

155 For preparation of protein lysates, animals were washed from plates and boiled in 4% SDS loading  
156 buffer at 95°C for 2 minutes. Lysates were separated on a 4-15% SDS gel (BIO-RAD), transferred  
157 to a PVDF membrane (EMD Millipore Immobilon) and probed with the following antibodies:  
158 monoclonal mouse anti-Flag antibody (Sigma-Aldrich #F1804) and monoclonal mouse anti- $\alpha$ -  
159 tubulin antibody (Sigma-Aldrich #T6199) diluted 1:2000 in blocking solution overnight.  
160 Following the primary incubation, blots were incubated with the goat anti-mouse HRP-conjugated  
161 secondary antibody, (MilliporeSigma 12-349), diluted 1:5000 in blocking solution for 1hr.  
162 Immunoblots were then developed using ECL kit (Thermo Fisher Scientific) and X-ray film  
163 (Phenix).

164

### 165 *Synchronized Populations*

166 To achieve tightly synchronized populations without potential biological artifacts introduced by a  
167 bleach/starvation synchronization protocol, we utilized the NemaSync *C. elegans* synchronizer  
168 model 5000 (InVivo Biosystems). Mixed-stage animals were grown to high density on twelve to  
169 twenty 10 mm NGM plates seeded with OP50 bacteria. Animals were then washed off in M9 and  
170 added to the stabilization filter, allowing gravid adults to be separated from all other stages . Adult  
171 animals were collected from the filter and pipetted onto the harvest filter. Recently hatched L1  
172 collected from 15-minute windows were then re-plated onto OP50-seeded plates and grown at  
173 20°C for precisely the desired time. All reported times for time-lapse imaging refer to time post-  
174 plating of synchronized L1 animals.

175

## 176 **RESULTS**

### 177 **Tagging endogenous MPK-1 via CRISPR**

## Endogenous MPK-1 expression and biomarker activity

178 The *mpk-1* gene encodes two variants with differing promoters and hence differing 5' ends.  
179 The longer *mpk-1b* transcript is predicted to yield a protein of approximately 51 kD, while the  
180 shorter *mpk-1a* transcript, which lacks the additional 5' exon, is predicted to encode a protein of  
181 43 kD (**Fig. 1A**). To ensure that we tagged both isoforms of endogenous MPK-1, we elected to  
182 insert our CRISPR tag in the 3' end of the gene, to generate proteins tagged at the C-terminus (**Fig.**  
183 **1A**). The final tagged *mpk-1* allele was confirmed through sequencing of flanking DNA and  
184 immunoblotting against the 3xFlag epitope. Both predicted isoforms were visible as expected at  
185 77 and 69 kDa including tags, respectively (**Fig. 1B**). This reagent positions us to assay  
186 endogenous MPK-1::mKate2<sup>3xFlag</sup> functions from a novel perspective.

187

### 188 **Endogenous MPK-1::mKate2 is expressed ubiquitously and throughout development**

189 Endogenous MPK-1::mKate2 was observed to be expressed in every cell type we could  
190 discern (**Fig. 2; S1**). We observed expression at each stage of development, from embryo to fertile  
191 adults, including the mature germline (**Figs. S1A-F; S2A-F**). Unexpectedly, expression levels  
192 were globally elevated during the L2 and L3 stages compared to L1, L4, and adults (**Figs. S1,S2**).  
193 It is unclear why this change might occur and be reversed. Additionally, throughout development  
194 higher levels of MPK-1 were observed in neurons in the head and in the rectal epithelium (**Fig.**  
195 **S1,S2**). We also observed elevated expression in the posterior gut, anterior gut, and pharynx (**Figs.**  
196 **S1,S2**), all consistent with pro-inflammatory functions. The highest expression levels of MPK-1  
197 were observed in the cells in the nerve ring around the pharynx and surrounding the anus (**Fig 3A-**  
198 **C, G-I**).

199 Given the varied but broad expression of MPK-1 throughout the animal we conducted a survey  
200 of its expression in various tissues in which prior research had established a role for MPK-1. Due

## Endogenous MPK-1 expression and biomarker activity

201 to the pivotal role of MPK-1 in germline development, we first it examined its expression pattern  
202 throughout the gonad, where multiple MPK-1-dependent events are known to occur (Arur et al.  
203 2009). Consistent with prior immunoblotting for total MPK-1 in dissected gonads, mpk-1 was  
204 expressed throughout the germline and generally localized to the cytoplasm (**Fig. 3D-F**).

205

### 206 **Endogenous MPK-1 is actively translocated to the nucleus in maturing oocytes**

207 Substantial work has examined the role of MPK-1 signaling within the developing germline of  
208 *C. elegans* (Arur et al. 2009). This system has benefitted from its ability to be dissected from the  
209 animal for immunostaining to determine subcellular localization for both total MPK-1 and dual  
210 phosphorylated MPK-1 (dpMPK-1; Lee et al. 2007). This approach has provided snapshots to  
211 allow an understanding of the spatial and temporal expression and phosphorylation patterns of  
212 MPK-1.

213 We examined the expression pattern and subcellular localization of endogenous MPK-  
214 1::mKate2<sup>3xFlag</sup> within in the proximal germline of animals 24 hrs post-mid-L4. In keeping with  
215 previous findings, MPK-1 expression was ubiquitous throughout the germline and largely  
216 excluded from the nucleus. An examination of the four oocytes most proximal to the uterus  
217 revealed infrequent nuclear translocation of MPK-1 in the most mature oocyte (position -1). Lee  
218 et al highlighted that dpMPK-1 staining and localization varied dependent upon its stage of  
219 maturation, with early oocytes displaying high nuclear expression (Lee et al. 2007). We also  
220 observation this variation in the nuclear localization of tagged endogenous MPK-1 within early  
221 oocytes (**Fig. 4**).

222

## Endogenous MPK-1 expression and biomarker activity

### 223 **RSKN-1 negative feedback regulates endogenous MPK-1 nuclear localization in developing** 224 **oocytes**

225 Prior work established RSKN-1, the *C. elegans* ortholog of p90 RSK kinase (Carriere et al.  
226 2008), as a downstream target of MPK-1 that functions in a negative feedback loop to inhibit  
227 and/or restrict activation of MPK-1 in maturing oocytes: *rksn-1*-specific depletion by RNA  
228 interference resulted in expansion of the compartment of oocytes displaying dpMPK-1 staining  
229 (Arur et al. 2009). Building on our previous findings with nuclear MPK-1 expression in the most  
230 mature diakinetically oocyte, we compared animals with or without deletion of *rskn-1*. In the wild type  
231 we observed consistent nuclear exclusion of MPK-1::mKate2 in the four most proximal diakinetically  
232 oocytes (**Fig. 5A,B,E**). In contrast, in *rskn-1(ok159)* mutant animals, nuclear localization was  
233 observed in all four proximal oocytes animals (**Fig. 5C,D,F**). This result validates cytosol-to-  
234 nuclear translocation of endogenous tagged MPK-1 as a biomarker for activation.

235

### 236 **Pn.p cells neighboring VPCs exhibit nuclear MPK-1 prior to VPC induction.**

237 We will describe how tagged endogenous MPK-1 translocates to the nuclei of all VPCs, the  
238 classic system for analysis of MPK-1 in *C. elegans* (see below). But first we will note our  
239 observation that P2.p, which is not a VPC and thus not competent to be induced to develop as a  
240 vulval lineage, exhibits a pool of tagged endogenous MPK-1 in its nucleus at a time when its  
241 posterior neighbors and VPCs, P3.p and P4.p, do not have nuclear MPK-1 (**Fig. 6A-C**). We  
242 propose that P2.p receives some signal through MPK-1 during a period in which VPCs are not  
243 receiving inductive signal from the AC.

244 In a subset of animals, P3.p fails to achieve competence as a VPC, probably because of variable  
245 Wnt signal from the posterior during the L2, which contributes to competence, while in other

## Endogenous MPK-1 expression and biomarker activity

246 animals, P3.p is a competent VPC (Euling and Ambros 1996; Myers and Greenwald 2007;  
247 Eisenmann et al. 1998). Accordingly, in some animals P3.p, P4.p and P5.p exhibit no nuclear  
248 MPK-1 (**Fig. 6D-F**), consistent with P3.p being a competent VPC in these animals and equipotent  
249 to its posterior neighbors P4.p and P5.p. In contrast, in other animals P3.p displays high nuclear  
250 MPK-1 when its posterior neighbors that are always VPCs, P4.p and P5.p, do not (**Fig. 6G-I**). We  
251 infer that these latter P3.p cells are not competent VPCs.

252 We observed a similar relationship between non-VPC P9.p and its competent anterior VPC  
253 neighbors P7.p and P8.p. Unlike the variability in P3.p competency, P7.p and P8.p are reported to  
254 always be competent VPCs in the wild type. We observed that at the time point where MPK-1 was  
255 excluded from the nucleus of P7.p and P8.p, a pool of MPK-1 was observed in the nucleus of P9.p  
256 (**Fig. S3**).

257 We do not know the nature of signals to non-VPC Pn.p cells at this stage, nor how many of the  
258 non-VPC Pn.ps respond to that signal. However, competent VPCs are presumably refractory in  
259 response to this signal, and/or non-VPC Pn.ps have a separate competency program. Additionally,  
260 absence vs. presence of nuclear MPK-1 in P3.p may be the earliest indicator of competence of  
261 P3.p as a VPC.

262 A phenomenon we observed was decreased expression of tagged HIS-72, an H3 histone, in  
263 non-VPC Pn.p cells. The green signal from P2.p was lower than in presumed competent P3.p and  
264 P4.p (**Fig. 6A**), including in P3.p where elevated nuclear translocation of tagged endogenous  
265 MPK-1 suggested that the cell was non-competent as a VPC (**Fig. 6G**). Similarly, the nuclear  
266 mNG::HIS-72 signal of non-VPC P9.p was weaker than its lineal homologs P7.p and P8.p (**Fig.**  
267 **S3A**). We speculate that HIS-72 is expressed at higher levels in VPCs than in non-VPC Pn.p cells  
268 to confer differential regulation of gene expression.



## Endogenous MPK-1 expression and biomarker activity

269

### 270 **Cytosol-to-nuclear translocation of endogenous MPK-1 is observed in all VPCs**

271 We examined cytosolic-to-nuclear translocation of tagged endogenous MPK-1 in  
272 developmental patterning of vulval precursor cell (VPC) fates. MPK-1 was originally identified in  
273 the VPC system by the ability of reduction-of-function mutations in *mpk-1* to suppress the ectopic  
274 Multivulva (Muv) phenotype conferred by constitutively activated LET-60/Ras (Wu and Han  
275 1994; Lackner et al. 1994). Subsequent studies implicated MPK-1 in phosphorylation and  
276 repression of the downstream transcription factors LIN-1/ETS and LIN-31/FoxB, which  
277 coordinate expression of the LIN-39 Hox transcription factor and the Mediator Complex to induce  
278 1° fate (Jacobs et al. 1998; Fantz et al. 2001; Wagmaister et al. 2006b; Wagmaister et al. 2006a;  
279 Bagshaw 1993; Tan et al. 1998; Miller et al. 1996; Underwood et al. 2017).

280 We failed to observe nuclear translocation of endogenous MPK-1 using the point-scanning  
281 Nikon A1 confocal microscope using randomly selected L3 stage animals. We reasoned that a  
282 combination of signal too faint to detect and too transient to encounter with regularity among  
283 randomly selected L3 animals compromised our efforts at detection. Consequently, we turned to a  
284 spinning disk confocal microscope with a more sensitive detector. We also used L3 animals  
285 synchronized by the NemaSynch filtration device, without the use of hypochlorite treatment and  
286 starvation that is typical in the field (see Materials and Methods). With these approaches, we were  
287 able to observe exclusion of MPK-1 from VPC nuclei followed by translocation of protein into  
288 VPC nuclei. However, detection of nuclear translocation of MPK-1::mK2 was still at the limit of  
289 detection of the instrument, and required deconvolution software to visualize (see Materials and  
290 Methods).

## Endogenous MPK-1 expression and biomarker activity

291 Since MPK-1 is necessary and sufficient for induction of 1° fate, we reasonably expected to  
292 observe nuclear translocation of tagged endogenous MPK-1 only in P6.p, the presumptive 1° cell.  
293 Unexpectedly, we observed translocation of MPK-1 to the nucleus in all six VPCs (**Fig. 7**). Our  
294 observation indicates that assessment of MPK-1 activation by nuclear translocation is qualitatively  
295 different than assessment by the previously reporter ERK-nKTR reporter (de la Cova et al. 2020).

296

### 297 **Translocation in VPCs occurs earlier and at higher level in P6.p than in flanking VPCs.**

298 The cytosol-to-nuclear translocation of MPK-1::mK2 occurred in a temporal gradient centered  
299 on the source of signal, the anchor cell: first in the Pn.p cell closest to the AC, P6.p (the  
300 presumptive 1° cell; **Fig. 7A-C; Fig. S4**), then in P5.p and P7.p (presumptive 2° cells **Fig. 7D-F**),  
301 and lastly in P3.p, P4.p and P8.p (presumptive 3° cells; **Fig. 7G-I; Supplementary Movie 1**). This  
302 observation indicates that all six VPCs receive the inductive signal from EGF/LIN-3.

303 MPK-1::mK2 is also recruited to P6.p, the presumptive 1°, at higher levels than surrounding  
304 presumptive 2° and 3° cells. After nuclear translocation was completed in all VPCs, we graphed  
305 levels of nuclear MPK-1::mK2 as a ratio to mNG::HIS-72. P6.p harbors significantly higher  
306 nuclear MPK-1::mK2 than do the neighboring P5.p and P7.p ( $P = 0.02$  and  $0.05$  respectively) (**Fig.**  
307 **8A**), or relative to P4.p and P5.p ( $P = 0.05$ ; **Fig. 8B**). Consequently, we conclude that MPK-1::mK2  
308 translocation into VPCs occurs in both a temporal and a concentration gradient centered on P6.p,  
309 the presumptive 1° cell. This temporal gradient of nuclear entry of MPK-1::mK2 into VPCs  
310 appears to mirror the hypothetical morphogen gradient of EGF inferred from genetic analyses  
311 (Sternberg and Horvitz 1986; Katz et al. 1995; Katz et al. 1996).

312 Taken together, our observations of the behavior of endogenous tagged MPK-1 in VPCs  
313 suggest unexpectedly rich information encoded in the Ras>Raf>MEK>ERK signal in time and

## Endogenous MPK-1 expression and biomarker activity

314 space. This information may reflect the LIN-3/EGF morphogen gradient from the Anchor Cell,  
315 lateral signaling via LIN-12/Notch as part of sequential induction of VPCs, or as-yet unknown  
316 feedback loops or parallel signals that regulate the MPK-1 signal at the level of cytosol-to-nuclear  
317 translocation.

318

## 319 **DISCUSSION**

320 By tagging the endogenous *C. elegans* ERK/MPK-1 and tracking its expression and subcellular  
321 movements *in vivo*, we have obtained a unique perspective on activation of MPK-1 by upstream  
322 signals. We emphasize that this is only one view of ERK activation: antibody detection of the  
323 dpMPK-1 phosphorylation or use of ERK-nKTR reporter of substrate phosphorylation are yet  
324 other, complementary views, though the former may not be feasible in the VPCs. But taken  
325 together these reagents can lead us to a thorough understanding of ERK activation and provide  
326 tools to interrogate mechanisms governing this phenomenon.

327 As anticipated, we observed that tagged endogenous MPK-1 is expressed ubiquitously.  
328 Expression is elevated in the nerve ring, perhaps a reflection of density of axonal/dendritic  
329 projections in ganglia of neurons (Chen et al. 2011). And we observed elevated expression in the  
330 rectal epithelium, a site of action that has been associated with anti-inflammatory activity in  
331 response to a nematode-specific bacterial pathogen, *Microbacterium nematophilum*, but  
332 presumably also in preparation for defense against other pathogens (Hodgkin et al. 2013; Anderson  
333 et al. 2013). Elevated expression via extrachromosomal array was previously observed in the rectal  
334 epithelium under control of the EGL-5 homeobox transcription factor, providing developmental  
335 insight into regulation of MPK-1 expression in different tissues (Nicholas and Hodgkin 2009),

## Endogenous MPK-1 expression and biomarker activity

336 while here we observe the same phenomenon with endogenous protein. Expression in the anterior  
337 gut, posterior gut and pharynx may also be indicators of an inflammatory mechanism to protect  
338 against pathogens.

339 Endogenous MPK-1 is also expressed throughout the germline. Tagged endogenous MPK-1  
340 allowed us to validate nuclear translocation of MPK-1 as a readout of upstream activation.  
341 Occasional proximal-most oocytes reveal nuclear MPK-1, and this field is expanded in animals  
342 mutant for *rskn-1*, a downstream kinase of MPK-1 possibly serving as a negative feedback loop  
343 (Arur et al. 2009). In the VPCs, in which dpMPK-1 has not been evaluated due to difficulty of  
344 fixation of somatic vs. germline structures, we observed translocation of MPK-1 into all six VPC  
345 nuclei.

346

### 347 **MPK-1 cytosolic-to-nuclear translocation in the VPCs**

348 The VPCs are a complex system in which at least four signaling cascades are orchestrated to  
349 generate the 3°-3°-2°-1°-2°-3° pattern of cell fates with fidelity: core 1°-promoting  
350 Ras>Raf>MEK>ERK (Sundaram 2013) and 2°-promoting Notch (Chen and Greenwald 2004)  
351 signals, coupled with modulatory 1°-promoting PI3K>PDK>Akt (Nakdimon et al. 2012; Shin et  
352 al. 2019) and 2°-promoting Ras>RalGEF>Ral>Exo84>GCK-2>MLK-1>PMK-1 signals (Shin et  
353 al. 2018; Zand et al. 2011). Additionally, temporal control of VPC patterning is tightly coordinated  
354 at the level of the entire animal, likely with the heterochronic system and cell cycle (Wang and  
355 Sternberg 1999; Ambros 1999; de la Cova et al. 2020). We observed cytosolic-to-nuclear  
356 translocation of MPK-1 in all six VPCs in the window during which the VPCs are patterned by  
357 LIN-3/EGF. We also observed both spatiotemporal and concentration gradients of MPK-1

## Endogenous MPK-1 expression and biomarker activity

358 translocation to the nucleus, focused on P6.p. Our observations are reminiscent of the graded  
359 morphogen signal inferred from classic developmental experiments in the vulva (Sternberg and  
360 Horvitz 1986; Katz et al. 1995; Katz et al. 1996). Are the temporal and concentration gradients of  
361 MPK-1 translocation, centered on P6.p, a direct reflection of a gradient of growth factor activation  
362 of its receptor, LET-23/EGFR? Alternatively, the gradients we observed may reflect the interplay  
363 of signals active in naïve VPCs, or in parallel to the Ras>Raf>MEK>ERK signal. Our results  
364 suggest that regulation of MPK-1 in VPCs is complex, and likely to be subject to a gating  
365 phenomenon that restricts the activity to P6.p, at precisely the correct time to induce 1° fate.

366

### 367 **Regulation of MPK-1/ERK activation**

368 Other signaling axes would naively be expected to extinguish sustained activation of MPK-1  
369 in cells other than P6.p. For example, the lateral signal from LIN-12/Notch, in which MPK-1-  
370 dependent synthesis of redundant DSL ligands activate LIN-12/Notch in neighboring VPCs P5/7.p  
371 to assume 2° fate (Chen and Greenwald 2004), might be predicted to preclude MPK-1 activation  
372 in those cells, or at least activation of substrate transcription factors. A transcriptional client gene  
373 of LIN-12/Notch, the ERK phosphatase LIP-1, is expressed in P5/7.p as a consequence of lateral  
374 signal (Berset et al. 2001). Signaling from LET-23/EGFR is similarly thought to be repressed by  
375 a receptor tyrosine phosphatase, DEP-1, thus further restricting ERK activation to P6.p as a  
376 consequence of initial sequential induction (Berset et al. 2005).

377 In contrast, we observe that endogenous MPK-1 enters the nuclei of all six VPCs, which  
378 implies that all six receive inductive signal via the LET-60/Ras>LIN-45/Raf>MEK-2/MEK MAP  
379 kinase cascade. In contrast to our results with tagged endogenous MPK-1, the ERK-nKTR reporter

## Endogenous MPK-1 expression and biomarker activity

380 of ERK activation of substrates suggested that MPK-1 was activated only in P6.p during the L3  
381 stage. (The ERK-nKTR marker was also active in pulsatile waves prior to induction, in the L2  
382 stage, hinting that some form of “pre-patterning” occurs prior to induction occurs; de la Cova et  
383 al. 2017). Though ectopically expressed, this reporter is single copy and hence unlikely to be  
384 subject to undesirable effects of over-expression, and is well validated elsewhere in the animal.  
385 Furthermore, activation of the ERK-nKTR biomarker closely resembles what we would expect  
386 from such a reporter predicted by the genetics: activation restricted to P6.p during the window in  
387 which P6.p is induced by the Ras>Raf>MEK>ERK cascade.

388 In addition to contradiction by the results using the ERK-nKTR reporter, our observation is  
389 conflict with transcriptional reporter analysis of genes reported to be responsive to MPK-1 1°-  
390 promoting signaling. During VPC induction, the promoter of the *egl-17* gene drives expression of  
391 CFP in an abbreviated gradient: expression is strong and sustained in P6.p but weak and transient  
392 in P5/7.p. The transient expression in P5/7.p is a result of LIN-12/Notch-dependent expression of  
393 the LIP-1/ERK phosphatase and other lateral signaling target genes (Yoo et al. 2004). Another  
394 reporter, the promoter of *lag-2* driving expression of YFP, is expressed only in 1° lineages (Zhang  
395 and Greenwald 2011).

396 We surmise that the discrepancy between the two methods of measurement reveals overlapping  
397 systems of regulation of MPK-1 to keep its activation constrained both spatially and temporally.  
398 At least at the level of MPK-1 translocation, activation of MPK-1 appears to be independent of  
399 LIN-12/Notch or expression of LIP-1. So there must be at least one other mechanism for gating  
400 the activity of MPK-1. Could output of MPK-1 be regulated through a series of interactions with  
401 transcription factors? This interpretation is unlikely, given that ERK-nKTR is a reporter of direct  
402 phosphorylation of substrate, and thus reflects activation of MPK-1 upstream of transcription

## Endogenous MPK-1 expression and biomarker activity

403 factors (de la Cova et al. 2017; Regot et al. 2014). But possibly the ERK-nKTR reporter does not  
404 represent dpMPK-1, just the ability to phosphorylate a specific, defined substrate. Or perhaps  
405 MPK-1 is rapidly dephosphorylated in all but P6.p though is not accompanied by nuclear export,  
406 but signaling to downstream LIN-1 and LIN31 transcription factors is nonetheless incapacitated.

407

### 408 **General MAP Kinases**

409 Other subfamilies of MAP kinases may share regulatory mechanisms. Our lab documented  
410 that tagged endogenous p38/MAP kinase, the known endpoint of the Ral 2<sup>o</sup>-promoting modulatory  
411 signal, is partially nuclear in every somatic cell of the animal (Shin et al. 2018; expression was  
412 likely silenced in the germline). This result was not observed with transgenic over-expression of  
413 GFP-tagged PMK-1 (Mertenskotter et al. 2013; our unpublished results), perhaps due to  
414 unfavorable signal-to-noise ratio attendant upon over-expression. Like ERK, p38 MAP kinases are  
415 also expected to undergo nuclear translocation upon activation (Ben-Levy et al. 1998). But perhaps  
416 a live animal experiences tonic, low-level activation of inflammatory responses mediated by PMK-  
417 1, maybe as a preventative measure against an environment with many pathogens. Thus, a small  
418 pool is always recruited to nuclei, but this pool may be miniscule compared to over-expressed  
419 heterologous protein, and so is lost due to infelicitous signal-to-noise ratio.

420 Still other subfamilies of MAP Kinases use nuclear translocation as a step in their activation  
421 of nuclear targets. JNK MAP Kinases translocate upon activation (Liu et al. 1996). The fourth  
422 subfamily of MAP Kinases, the non-canonical ERK5 with its transactivation domain that regulates  
423 transcription, is also regulated by translocation to the nucleus upon activation by upstream  
424 cascades (Gomez et al. 2016). Thus, this regulatory modality of MAP kinases is well-established.

## Endogenous MPK-1 expression and biomarker activity

425       Importantly, we note that many MPK-1 targets are not transcription factors or other proteins  
426 occupying the nucleus, and thus are not subject to nuclear translocation of MPK-1 as a biomarker  
427 for activation. This is clearly true for MPK-1 substrates in the germline, where myriad non-nuclear  
428 substrates have been identified and dpMPK-1 detected via antibody staining of fixed, extruded  
429 gonads (Arur et al. 2009). But non-nuclear substrates throughout the animal are also likely to be  
430 subject to phosphorylation by MPK-1. This phenomenon restricts the utility of tagged endogenous  
431 MPK-1 to events in the nucleus.

432       Our analysis points to nuclear translocation of endogenous MPK-1 as a robust system for  
433 analyzing activation in a live animal. This includes transient activation during developmental  
434 patterning of VPC fate, which was detected only at the lower limit of sensitivity of our instrument.  
435 We also conclude that the VPCs are a system where multiple levels of regulation of ERK are  
436 employed to achieve the desired developmental outcome. Though outside the scope of this  
437 analysis, nuclear translocation of endogenous MPK-1, the ERK-nKTR reporter, and perhaps  
438 antibody detection of dpMPK-1 could be deployed in concert to disentangle relationships between  
439 different modalities of regulation of ERK activation in an active developmental system. In the end  
440 there can be only one: P6.p assumes 1° fate in 99.8% of wild-type animals (Braendle and Felix  
441 2008; Shin et al. 2019). Layers of regulation of ERK, including control of nuclear translocation,  
442 may impose strictures that contribute to this level of developmental fidelity.

443

## 444 **ACKNOWLEDGEMENTS**

445 This work was supported by NIH grant R01GM121625 and John Templeton Foundation Grant  
446 ID# 61099 to D.J.R., and ACS PF-16-083-01 post-doctoral fellowship to N.R. Some strains were



## Endogenous MPK-1 expression and biomarker activity

447 provided by the CGC, which is funded by NIH Office of Research Infrastructure Programs (P40  
448 OD010440). Wormbase was used regularly. We thank Nikon representatives for providing  
449 expertise, resources, and the instrument demo in which we first observed the phenomenon of  
450 MPK-1 translocation in VPC nuclei.

451

452

453

454

### 455 **FIGURE LEGENDS**

456 **Figure 1. Tagging endogenous *mpk-1* using the SEC strategy.** **A)** Diagram of the strategy for  
457 the CRISPR/Cas-9-dependent knock-in of mKate2::SEC<sup>3</sup>Flag into the 3' end of *mpk-1*. **B)**  
458 Immunoblotting for MPK-1::mKate2<sup>3</sup>Flag via the 3xFlag epitope tag along with  $\alpha$ -tubulin  
459 loading control.

460

461 **Figure 2. MPK-1 is expressed ubiquitously in *C. elegans*.** Representative photomicrographs of  
462 **A)** MPK-1::mKate2 expression along with corresponding **B)** DIC images of an adult animal. Scale  
463 bars = 100  $\mu$ m

464

465 **Figure 3. Details of tagged endogenous MPK-1::mKate2 expression and localization.**  
466 Representative confocal photomicrographs are shown. **A, D, G)** Red filter set visualizing MPK-  
467 1::mKate2. **B, E, H)** Green filter set visualizing mNG::HIS-72 nuclei. **C, F, I)** DIC (Nomarski).

## Endogenous MPK-1 expression and biomarker activity

468 **A, B, C)** Adult pharynx. **D, E, F)** Mature gonad turn without embryos. **G, H, I)** Adult tail with  
469 elevated intensity in rectal epithelia. Scale bars = 10  $\mu$ m.

470

471 **Figure 4. MPK-1 nuclear localization in maturing proximal oocytes.** Representative confocal  
472 and DIC photomicrographs are shown. Positions are indicated as -1 (most mature) through -4 (least  
473 mature). Arrow indicates nucleus with translocated MPK-1::mK2. **A)** Red channel, MPK-1::mK2  
474 in cytosol but with a pool of tagged protein translocated to the nucleus in the most proximal oocyte  
475 (position -1). **B)** Green channel, the same animals with green mNG::HIS-72 nuclear marker. **C)**  
476 DIC images of the four most proximal developing oocytes. Scale bars = 10  $\mu$ m.

477

478 **Figure 5. RSKN-1 negatively regulates nuclear translocation of endogenous MPK-1 in**  
479 **maturing oocytes.** Matched representative confocal photomicrographs are shown. **A, B, C)** A  
480 wild-type animal shows infrequent translocation of endogenous tagged MPK-1 to nuclei. **D, E, F)**  
481 An *rskn-1(ok159)* deletion mutant reveals translocation of MPK-1 to every maturing nucleus. **A,**  
482 **D)** mNG::HIS-72-marked nuclei. **B, E)** MPK-1::mK2 signal. Scale bars = 10  $\mu$ m. **C, F)** Tabulation  
483 of observed wild-type vs. mutant animals (n=15; the gray marker in **C** represents an animal in  
484 which the nucleus in position -4 was out of the plane of focus).

485

486 **Figure 6: Pn.p neighbors of VPCs have high nuclear MPK-1.** **A, D, G)** mNG::His-72 nuclear  
487 marker; **B, E, H)** MPK-1::mK2 red signal; **C, F, I)** Merged images. Large spaces of signal  
488 exclusion are nuclei, small spaces of signal exclusion are nucleoli (see green DNA signal). Orange  
489 arrows indicate high nuclear MPK-1, white arrows indicate low nuclear MPK-1. The white

## Endogenous MPK-1 expression and biomarker activity

490 arrowheads indicate VPC and non-VPC nuclei with differing levels of mNG::HIS-72 intensity. **A,**  
491 **B, C)** Nuclear MPK-1 is high in P2.p and low in P3.p and P4.p. **D, E, F)** Nuclear MPK-1 is low in  
492 P3.p, P4.p and P5.p. **G, H, I)** Nuclear MPK-1 is high in P3.p and low in P4.p and P5.p. Scale bars  
493 = 10  $\mu\text{m}$ .

494

495 **Figure 7: MPK-1 enters the nuclei of all VPCs, starting with P6.p.** Confocal photomicrographs  
496 of tagged endogenous MPK-1 and HIS-72. **A, D, G)** Green channel mNG::HIS-72. **B, E, H)** Red  
497 channel MPK-1::mKate2. **C, F, I)** Merged images. Orange arrows indicate nuclear MPK-1 signal,  
498 white arrows indicate nuclear exclusion of signal, judged primarily by visualization of the  
499 nucleolus in the red channel. Left-to-right are three time points. We were unable to reproducibly  
500 image one animal continually throughout the time course of VPC induction, due to indicators of  
501 desiccation and toxicity. In this series of confocal photomicrographs, the first set of panels (**A-C**)  
502 is a different animal than in the second and third sets (**D-F** and **G-I**), which are the same animal at  
503 different time points. But these figures are representative of the observed process. The animal in  
504 **A-C** is also enlarged relative to later stages to better see VPC nuclei. Scale bars = 10  $\mu\text{m}$ .

505

506 **Figure 8: MPK-1 Nuclear Localization is higher in P6.p.** **A)** Quantification of nuclear MPK-  
507 1::mK2, determined by the ratio of the CTNF (corrected total nuclear fluorescence) between MPK-  
508 1::mK2 and mNG::HIS-72 is shown for P5.p, P6.p and P7.p. (Standard error was calculated for  
509 each time point across the samples, n=6). **B)** Quantification of nuclear MPK-1::mK2, determined  
510 by the ratio of the CTNF between MPK-1::mK2 and mNG::HIS-72 is shown for P4.p, P5.p and  
511 P6.p. (Standard error was calculated for each time point across the samples, n=6). \* = P-value  
512 <0.05 as calculated by ANOVA

## Endogenous MPK-1 expression and biomarker activity

513

514 **Supplemental Movie 1:** Time lapse film of MPK-1::mKate2 entering P6.p first. Arrows indicate

515 P6.p and other VPCs.

516

517 **Supplementary Table 1**

518 **Strains**

| Strain | Genotype                                                                                                             |
|--------|----------------------------------------------------------------------------------------------------------------------|
| DV3261 | <i>mpk-1(re171[mpk-1::mKate2::SEC::3xFlag]) III</i>                                                                  |
| DV3262 | <i>mpk-1(re172[mpk-1::mKate2<sup>3xFlag</sup>]) III</i>                                                              |
| DV3285 | <i>his-72(cp76[mNG<sup>3xFlag</sup>::his-72]), mpk-1(re172[mpk-1::mKate2::3xFlag]) III</i>                           |
| BS3760 | <i>rskn-1(ok159) I</i>                                                                                               |
| DV3317 | <i>rskn-1(ok159) I; his-72(cp76[mNG<sup>3xFlag</sup>::his-72]), mpk-1(re172[mpk-1::mKate2<sup>3xFlag</sup>]) III</i> |

519

520 **Supplementary Table 2**

521 **Primers**

| Name   | Sequence                                         | Used for                     |
|--------|--------------------------------------------------|------------------------------|
| oNR065 | GGCTCATCACAGACGAATGGGTTTAAGAGCT<br>ATGCTGGAAACAG | mpk-1 sgRNA-1<br>mutagenesis |
| oNR066 | AGCTTTTCAGCGGGAACGGGGTTTAAGAGCT<br>ATGCTGGAAACAG | mpk-1 sgRNA-2<br>mutagenesis |
| oNR023 | CAAGACATCTCGCAATAGG                              | mpk-1 sgRNA<br>mutagenesis   |

## Endogenous MPK-1 expression and biomarker activity

|        |                                                                                                                                                                                                                                                                                                                                         |                                |
|--------|-----------------------------------------------------------------------------------------------------------------------------------------------------------------------------------------------------------------------------------------------------------------------------------------------------------------------------------------|--------------------------------|
| oNR059 | CGTGATTACAAGGATGACGATGACAAGAGA<br>ATTAGTAGTATTTACCCACTAAATTAG                                                                                                                                                                                                                                                                           | mpk-1 homology<br>arm-2 FW     |
| oNR060 | GGAAACAGCTATGACCATGTTATCGATTTCC<br>GCTATGATTTGTTGTGTAAACC                                                                                                                                                                                                                                                                               | mpk-1 homology<br>arm-2 RV     |
| oNR067 | CGATTTTCAGTATCGACATCGAGCAAGCATT<br>GGCTCACCCATACTTGGAGCAATACTACGAT<br>CCAGGAGATGAGCCAGTTTGTGAGGAACCAT<br>TCACTTTGGAAATGGAATTCGACGATTTACC<br>GAAGGAGAAGCTGAAGGAGCTGATTTGGGA<br>AGAAGCCGAGGCTCATCACAGACGAATGGA<br>GGCAGAAGCGGCTGCAAGGAATAATGGAGG<br>GCAGAATCCTGTTTCAGCCGGAGGTAGCGCC<br>GGCGGAAGTGCTGGTGAATGGTCTCCGAGC<br>TCATTAAGAAAACATG | mpk-1 homology<br>arm-1 gBlock |
| oNR094 | ACCAAAACAACCATGGGCTCG                                                                                                                                                                                                                                                                                                                   | mpk-1 genotyping<br>FW         |
| oNR095 | GCTCCAAGTATGGGTGAGCC                                                                                                                                                                                                                                                                                                                    | mpk-1 genotyping<br>RV-1       |
| oNR096 | GGTCCCTCGTATGGCTTTCC                                                                                                                                                                                                                                                                                                                    | mpk-1 genotyping<br>RV-2       |

522

### 523 **Supplementary Table 3** 524 **Plasmids**

| Name    | Description                        | Used for                           |
|---------|------------------------------------|------------------------------------|
| pNR9    | Cas9 and MPK-1 sgRNA-1             | MPK-1 sgRNA-1                      |
| pNR10   | Cas9 and MPK-1 sgRNA-2             | MPK-1 sgRNA-2                      |
| pNR11   | MPK-1::mKate2 <sup>3</sup> xFlag   | SEC CRISPR plasmid repair template |
| pCFJ104 | <i>P<sub>myo-3</sub>::mCherry</i>  | Co-injection marker                |
| pJW1236 | Cas9 and sgRNA expression plasmid  | mpk-1 SEC-CRISPR tagging           |
| pDD285  | mKate2::3xFlag SEC repair template | mpk-1 SEC CRISPR repair template   |

525

### 526 **Supplementary Table 4** 527 **sgRNA sequences and PAMs**

| Sequence             | Used for                 |
|----------------------|--------------------------|
| GGCTCATCACAGACGAATGG | mpk-1 SEC-CRISPR tagging |
| AGCTTTTCAGCGGGAACGGG | mpk-1 SEC-CRISPR tagging |

528

## Endogenous MPK-1 expression and biomarker activity

529

### 530 REFERENCES

- 531 Ajenjo, N., E. Canon, I. Sanchez-Perez, D. Matallanas, J. Leon *et al.*, 2004 Subcellular localization  
532 determines the protective effects of activated ERK2 against distinct apoptogenic stimuli in  
533 myeloid leukemia cells. *J Biol Chem* 279 (31):32813-32823.
- 534 Ambros, V., 1999 Cell cycle-dependent sequencing of cell fate decisions in *Caenorhabditis elegans* vulva  
535 precursor cells. *Development* 126 (9):1947-1956.
- 536 Anderson, A., H. Laurenson-Schafer, F.A. Partridge, J. Hodgkin, and R. McMullan, 2013 Serotonergic  
537 chemosensory neurons modify the *C. elegans* immune response by regulating G-protein signaling  
538 in epithelial cells. *PLoS Pathog* 9 (12):e1003787.
- 539 Arur, S., M. Ohmachi, S. Nayak, M. Hayes, A. Miranda *et al.*, 2009 Multiple ERK substrates execute  
540 single biological processes in *Caenorhabditis elegans* germ-line development. *Proc Natl Acad Sci*  
541 *U S A* 106 (12):4776-4781.
- 542 Bagshaw, M.A., 1993 Results and new directions in the definitive treatment of prostate cancer with  
543 radiotherapy. *Front Radiat Ther Oncol* 27:166-172.
- 544 Ben-Levy, R., S. Hooper, R. Wilson, H.F. Paterson, and C.J. Marshall, 1998 Nuclear export of the stress-  
545 activated protein kinase p38 mediated by its substrate MAPKAP kinase-2. *Curr Biol* 8 (19):1049-  
546 1057.
- 547 Berset, T., E.F. Hoier, G. Battu, S. Canevascini, and A. Hajnal, 2001 Notch inhibition of RAS signaling  
548 through MAP kinase phosphatase LIP-1 during *C. elegans* vulval development. *Science* 291  
549 (5506):1055-1058.
- 550 Berset, T.A., E.F. Hoier, and A. Hajnal, 2005 The *C. elegans* homolog of the mammalian tumor  
551 suppressor Dep-1/Sccl inhibits EGFR signaling to regulate binary cell fate decisions. *Genes Dev*  
552 19 (11):1328-1340.
- 553 Biggs, W.H., 3rd, K.H. Zavitz, B. Dickson, A. van der Straten, D. Brunner *et al.*, 1994 The *Drosophila*  
554 rolled locus encodes a MAP kinase required in the sevenless signal transduction pathway. *EMBO*  
555 *J* 13 (7):1628-1635.
- 556 Braendle, C., and M.A. Felix, 2008 Plasticity and errors of a robust developmental system in different  
557 environments. *Dev Cell* 15 (5):714-724.
- 558 Brenner, S., 1974 The genetics of *Caenorhabditis elegans*. *Genetics* 77 (1):71-94.
- 559 Cargnello, M., and P.P. Roux, 2011 Activation and function of the MAPKs and their substrates, the  
560 MAPK-activated protein kinases. *Microbiol Mol Biol Rev* 75 (1):50-83.
- 561 Carriere, A., H. Ray, J. Blenis, and P.P. Roux, 2008 The RSK factors of activating the Ras/MAPK  
562 signaling cascade. *Front Biosci* 13:4258-4275.
- 563 Chen, L., Y. Fu, M. Ren, B. Xiao, and C.S. Rubin, 2011 A RasGRP, *C. elegans* RGEF-1b, couples  
564 external stimuli to behavior by activating LET-60 (Ras) in sensory neurons. *Neuron* 70 (1):51-65.
- 565 Chen, N., and I. Greenwald, 2004 The lateral signal for LIN-12/Notch in *C. elegans* vulval development  
566 comprises redundant secreted and transmembrane DSL proteins. *Dev Cell* 6 (2):183-192.
- 567 Church, D.L., K.L. Guan, and E.J. Lambie, 1995 Three genes of the MAP kinase cascade, mek-2, mpk-  
568 1/sur-1 and let-60 ras, are required for meiotic cell cycle progression in *Caenorhabditis elegans*.  
569 *Development* 121 (8):2525-2535.
- 570 de la Cova, C., R. Townley, S. Regot, and I. Greenwald, 2017 A Real-Time Biosensor for ERK Activity  
571 Reveals Signaling Dynamics during *C. elegans* Cell Fate Specification. *Dev Cell* 42 (5):542-553  
572 e544.
- 573 de la Cova, C.C., R. Townley, and I. Greenwald, 2020 Negative feedback by conserved kinases patterns  
574 the degradation of *Caenorhabditis elegans* Raf in vulval fate patterning. *Development* 147 (24).
- 575 Derijard, B., J. Raingeaud, T. Barrett, I.H. Wu, J. Han *et al.*, 1995 Independent human MAP-kinase signal  
576 transduction pathways defined by MEK and MKK isoforms. *Science* 267 (5198):682-685.

## Endogenous MPK-1 expression and biomarker activity

- 577 Dickinson, D.J., A.M. Pani, J.K. Heppert, C.D. Higgins, and B. Goldstein, 2015 Streamlined Genome  
578 Engineering with a Self-Excising Drug Selection Cassette. *Genetics* 200 (4):1035-1049.
- 579 Durrant, D.E., and D.K. Morrison, 2018 Targeting the Raf kinases in human cancer: the Raf dimer  
580 dilemma. *Br J Cancer* 118 (1):3-8.
- 581 Eisenmann, D.M., J.N. Maloof, J.S. Simske, C. Kenyon, and S.K. Kim, 1998 The beta-catenin homolog  
582 BAR-1 and LET-60 Ras coordinately regulate the Hox gene *lin-39* during *Caenorhabditis elegans*  
583 vulval development. *Development* 125 (18):3667-3680.
- 584 Euling, S., and V. Ambros, 1996 Heterochronic genes control cell cycle progress and developmental  
585 competence of *C. elegans* vulva precursor cells. *Cell* 84 (5):667-676.
- 586 Fantz, D.A., D. Jacobs, D. Glossip, and K. Kornfeld, 2001 Docking sites on substrate proteins direct  
587 extracellular signal-regulated kinase to phosphorylate specific residues. *J Biol Chem* 276  
588 (29):27256-27265.
- 589 Gomez, N., T. Erazo, and J.M. Lizcano, 2016 ERK5 and Cell Proliferation: Nuclear Localization Is What  
590 Matters. *Front Cell Dev Biol* 4:105.
- 591 Gonzalez, F.A., A. Seth, D.L. Raden, D.S. Bowman, F.S. Fay *et al.*, 1993 Serum-induced translocation of  
592 mitogen-activated protein kinase to the cell surface ruffling membrane and the nucleus. *J Cell*  
593 *Biol* 122 (5):1089-1101.
- 594 Harvey, C.D., A.G. Ehrhardt, C. Cellurale, H. Zhong, R. Yasuda *et al.*, 2008 A genetically encoded  
595 fluorescent sensor of ERK activity. *Proc Natl Acad Sci U S A* 105 (49):19264-19269.
- 596 Hatzivassiliou, G., K. Song, I. Yen, B.J. Brandhuber, D.J. Anderson *et al.*, 2010 RAF inhibitors prime  
597 wild-type RAF to activate the MAPK pathway and enhance growth. *Nature* 464 (7287):431-435.
- 598 Hodgkin, J., M.A. Felix, L.C. Clark, D. Stroud, and M.J. Gravato-Nobre, 2013 Two *Leucobacter* strains  
599 exert complementary virulence on *Caenorhabditis* including death by worm-star formation. *Curr*  
600 *Biol* 23 (21):2157-2161.
- 601 Horvitz, H.R., S. Brenner, J. Hodgkin, and R.K. Herman, 1979 A uniform genetic nomenclature for the  
602 nematode *Caenorhabditis elegans*. *Mol Gen Genet* 175 (2):129-133.
- 603 Huang, C.Y., and T.H. Tan, 2012 DUSPs, to MAP kinases and beyond. *Cell Biosci* 2 (1):24.
- 604 Jacobs, D., G.J. Beitel, S.G. Clark, H.R. Horvitz, and K. Kornfeld, 1998 Gain-of-function mutations in  
605 the *Caenorhabditis elegans* *lin-1* ETS gene identify a C-terminal regulatory domain  
606 phosphorylated by ERK MAP kinase. *Genetics* 149 (4):1809-1822.
- 607 Katz, W.S., R.J. Hill, T.R. Clandinin, and P.W. Sternberg, 1995 Different levels of the *C. elegans* growth  
608 factor LIN-3 promote distinct vulval precursor fates. *Cell* 82 (2):297-307.
- 609 Katz, W.S., G.M. Lesa, D. Yannoukakos, T.R. Clandinin, J. Schlessinger *et al.*, 1996 A point mutation in  
610 the extracellular domain activates LET-23, the *Caenorhabditis elegans* epidermal growth factor  
611 receptor homolog. *Mol Cell Biol* 16 (2):529-537.
- 612 Kolch, W., 2005 Coordinating ERK/MAPK signalling through scaffolds and inhibitors. *Nat Rev Mol Cell*  
613 *Biol* 6 (11):827-837.
- 614 Krishna, M., and H. Narang, 2008 The complexity of mitogen-activated protein kinases (MAPKs) made  
615 simple. *Cell Mol Life Sci* 65 (22):3525-3544.
- 616 Lackner, M.R., and S.K. Kim, 1998 Genetic analysis of the *Caenorhabditis elegans* MAP kinase gene  
617 *mpk-1*. *Genetics* 150 (1):103-117.
- 618 Lackner, M.R., K. Kornfeld, L.M. Miller, H.R. Horvitz, and S.K. Kim, 1994 A MAP kinase homolog,  
619 *mpk-1*, is involved in ras-mediated induction of vulval cell fates in *Caenorhabditis elegans*. *Genes*  
620 *Dev* 8 (2):160-173.
- 621 Lee, M.H., M. Ohmachi, S. Arur, S. Nayak, R. Francis *et al.*, 2007 Multiple functions and dynamic  
622 activation of MPK-1 extracellular signal-regulated kinase signaling in *Caenorhabditis elegans*  
623 germline development. *Genetics* 177 (4):2039-2062.
- 624 Lenormand, P., C. Sardet, G. Pages, G. L'Allemain, A. Brunet *et al.*, 1993 Growth factors induce nuclear  
625 translocation of MAP kinases (p42mapk and p44mapk) but not of their activator MAP kinase  
626 kinase (p45mapkk) in fibroblasts. *J Cell Biol* 122 (5):1079-1088.



## Endogenous MPK-1 expression and biomarker activity

- 627 Lin, A., A. Minden, H. Martinetto, F.X. Claret, C. Lange-Carter *et al.*, 1995 Identification of a dual  
628 specificity kinase that activates the Jun kinases and p38-Mpk2. *Science* 268 (5208):286-290.
- 629 Liu, Z.G., R. Baskaran, E.T. Lea-Chou, L.D. Wood, Y. Chen *et al.*, 1996 Three distinct signalling  
630 responses by murine fibroblasts to genotoxic stress. *Nature* 384 (6606):273-276.
- 631 Mertenskotter, A., A. Keshet, P. Gerke, and R.J. Paul, 2013 The p38 MAPK PMK-1 shows heat-induced  
632 nuclear translocation, supports chaperone expression, and affects the heat tolerance of  
633 *Caenorhabditis elegans*. *Cell Stress Chaperones* 18 (3):293-306.
- 634 Miller, L.M., D.A. Waring, and S.K. Kim, 1996 Mosaic analysis using a ncl-1 (+) extrachromosomal  
635 array reveals that lin-31 acts in the Pn.p cells during *Caenorhabditis elegans* vulval development.  
636 *Genetics* 143 (3):1181-1191.
- 637 Myers, T.R., and I. Greenwald, 2007 Wnt signal from multiple tissues and lin-3/EGF signal from the  
638 gonad maintain vulval precursor cell competence in *Caenorhabditis elegans*. *Proc Natl Acad Sci*  
639 *U S A* 104 (51):20368-20373.
- 640 Nakdimon, I., M. Walser, E. Frohli, and A. Hajnal, 2012 PTEN negatively regulates MAPK signaling  
641 during *Caenorhabditis elegans* vulval development. *PLoS Genet* 8 (8):e1002881.
- 642 Nicholas, H.R., and J. Hodgkin, 2004 The ERK MAP kinase cascade mediates tail swelling and a  
643 protective response to rectal infection in *C. elegans*. *Curr Biol* 14 (14):1256-1261.
- 644 Nicholas, H.R., and J. Hodgkin, 2009 The *C. elegans* Hox gene *egl-5* is required for correct development  
645 of the hermaphrodite hindgut and for the response to rectal infection by *Microbacterium*  
646 *nematophilum*. *Dev Biol* 329 (1):16-24.
- 647 Poulikakos, P.I., C. Zhang, G. Bollag, K.M. Shokat, and N. Rosen, 2010 RAF inhibitors transactivate  
648 RAF dimers and ERK signalling in cells with wild-type BRAF. *Nature* 464 (7287):427-430.
- 649 Regot, S., J.J. Hughey, B.T. Bajar, S. Carrasco, and M.W. Covert, 2014 High-sensitivity measurements of  
650 multiple kinase activities in live single cells. *Cell* 157 (7):1724-1734.
- 651 Ryan, M.B., C.J. Der, A. Wang-Gillam, and A.D. Cox, 2015 Targeting RAS-mutant cancers: is ERK the  
652 key? *Trends Cancer* 1 (3):183-198.
- 653 Shin, H., C. Braendle, K.B. Monahan, R.E.W. Kaplan, T.P. Zand *et al.*, 2019 Developmental fidelity is  
654 imposed by genetically separable RalGEF activities that mediate opposing signals. *PLoS Genet*  
655 15 (5):e1008056.
- 656 Shin, H., R.E.W. Kaplan, T. Duong, R. Fakieh, and D.J. Reiner, 2018 Ral Signals through a MAP4  
657 Kinase-p38 MAP Kinase Cascade in *C. elegans* Cell Fate Patterning. *Cell Rep* 24 (10):2669-2681  
658 e2665.
- 659 Sternberg, P.W., and H.R. Horvitz, 1986 Pattern formation during vulval development in *C. elegans*. *Cell*  
660 44 (5):761-772.
- 661 Sundaram, M.V., 2013 Canonical RTK-Ras-ERK signaling and related alternative pathways.  
662 *WormBook*:1-38.
- 663 Tan, P.B., M.R. Lackner, and S.K. Kim, 1998 MAP kinase signaling specificity mediated by the LIN-1  
664 Ets/LIN-31 WH transcription factor complex during *C. elegans* vulval induction. *Cell* 93 (4):569-  
665 580.
- 666 Unal, E.B., F. Uhlitz, and N. Bluthgen, 2017 A compendium of ERK targets. *FEBS Lett* 591 (17):2607-  
667 2615.
- 668 Underwood, R.S., Y. Deng, and I. Greenwald, 2017 Integration of EGFR and LIN-12/Notch Signaling by  
669 LIN-1/Elk1, the Cdk8 Kinase Module, and SUR-2/Med23 in Vulval Precursor Cell Fate  
670 Patterning in *Caenorhabditis elegans*. *Genetics* 207 (4):1473-1488.
- 671 Wagmaister, J.A., J.E. Gleason, and D.M. Eisenmann, 2006a Transcriptional upregulation of the *C.*  
672 *elegans* Hox gene *lin-39* during vulval cell fate specification. *Mech Dev* 123 (2):135-150.
- 673 Wagmaister, J.A., G.R. Miley, C.A. Morris, J.E. Gleason, L.M. Miller *et al.*, 2006b Identification of cis-  
674 regulatory elements from the *C. elegans* Hox gene *lin-39* required for embryonic expression and  
675 for regulation by the transcription factors LIN-1, LIN-31 and LIN-39. *Dev Biol* 297 (2):550-565.



## Endogenous MPK-1 expression and biomarker activity

- 676 Wang, M., and P.W. Sternberg, 1999 Competence and commitment of *Caenorhabditis elegans* vulval  
677 precursor cells. *Dev Biol* 212 (1):12-24.
- 678 Wu, Y., and M. Han, 1994 Suppression of activated Let-60 ras protein defines a role of *Caenorhabditis*  
679 *elegans* Sur-1 MAP kinase in vulval differentiation. *Genes Dev* 8 (2):147-159.
- 680 Yoo, A.S., C. Bais, and I. Greenwald, 2004 Crosstalk between the EGFR and LIN-12/Notch pathways in  
681 *C. elegans* vulval development. *Science* 303 (5658):663-666.
- 682 Yoon, S., and R. Seger, 2006 The extracellular signal-regulated kinase: multiple substrates regulate  
683 diverse cellular functions. *Growth Factors* 24 (1):21-44.
- 684 Zand, T.P., D.J. Reiner, and C.J. Der, 2011 Ras effector switching promotes divergent cell fates in *C.*  
685 *elegans* vulval patterning. *Dev Cell* 20 (1):84-96.
- 686 Zhang, X., and I. Greenwald, 2011 Spatial regulation of lag-2 transcription during vulval precursor cell  
687 fate patterning in *Caenorhabditis elegans*. *Genetics* 188 (4):847-858.
- 688

# Rasmussen Figure 1

A

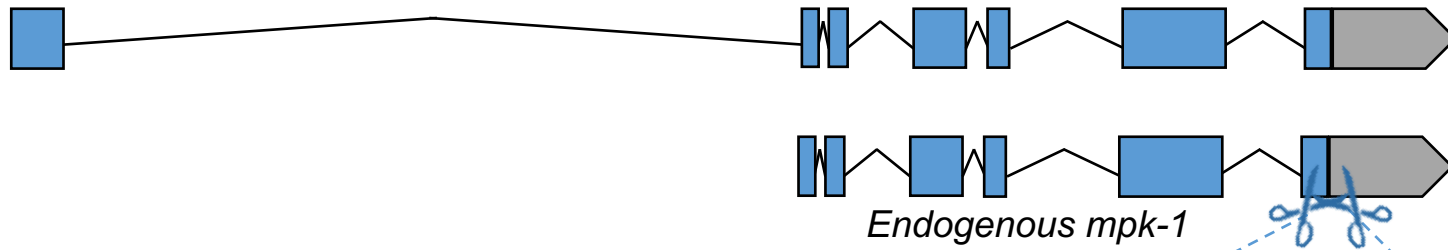

B

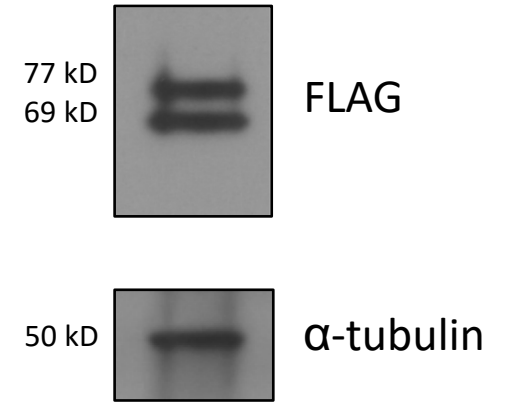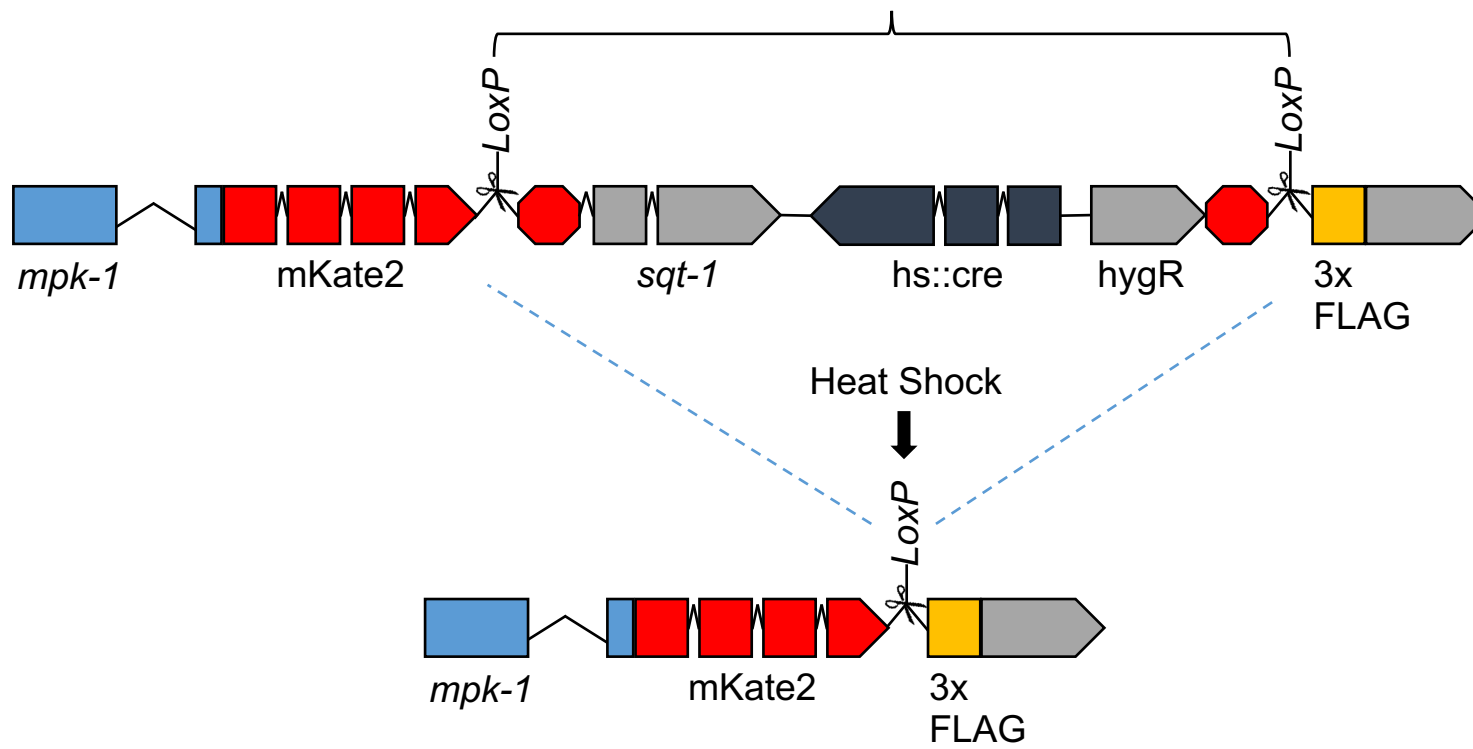

Rasmussen Figure 2

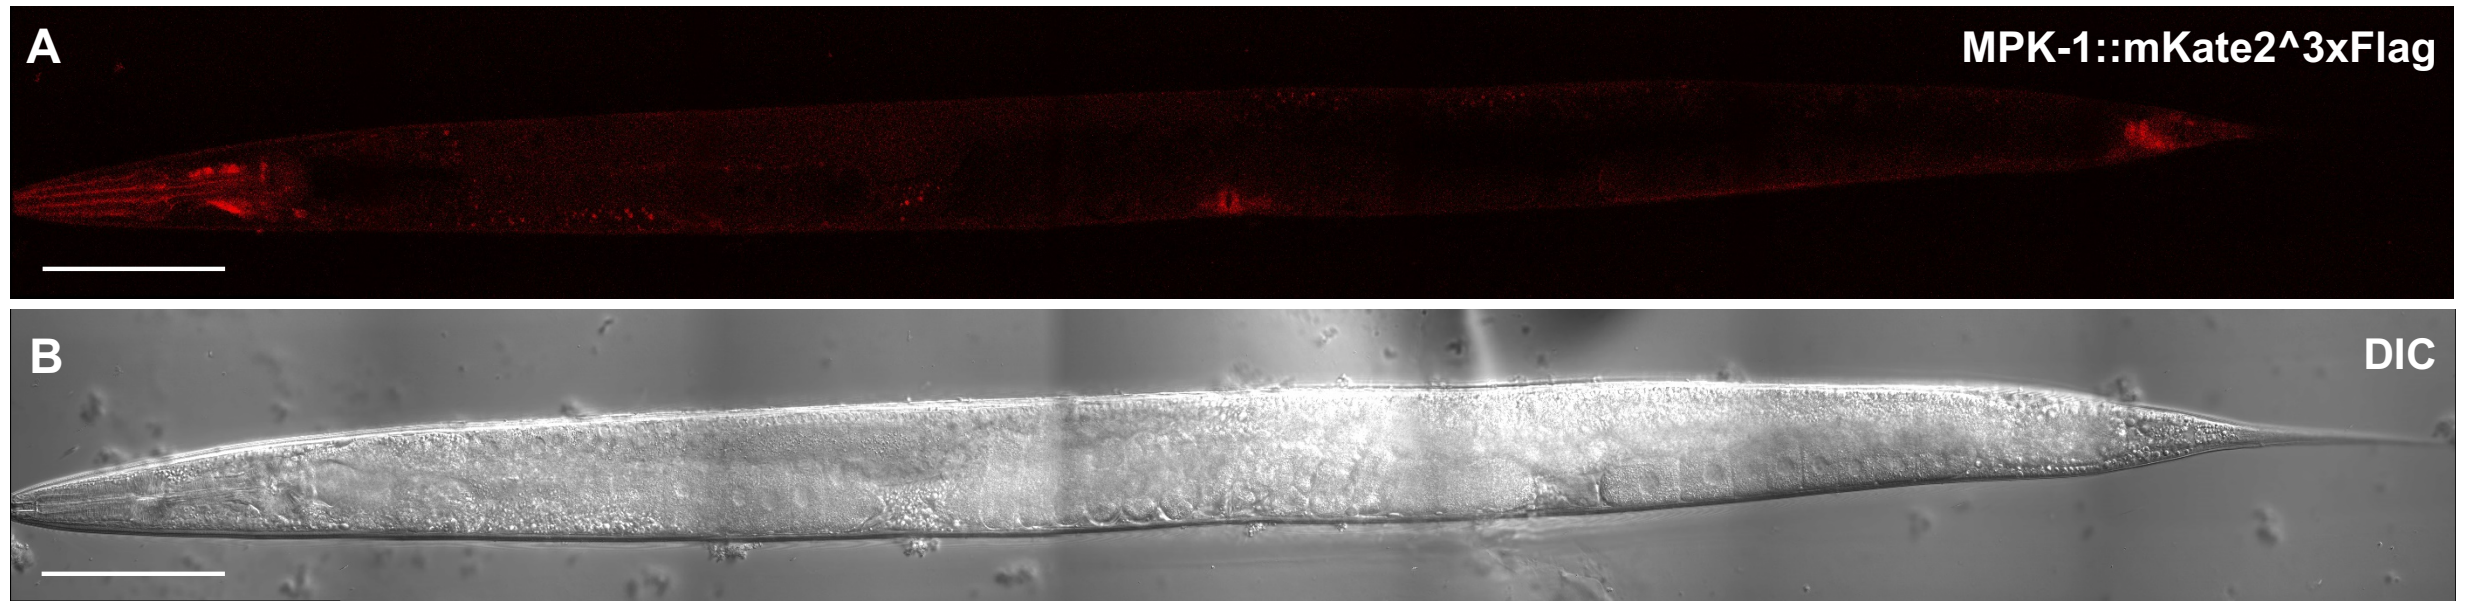



# Rasmussen Figure 3

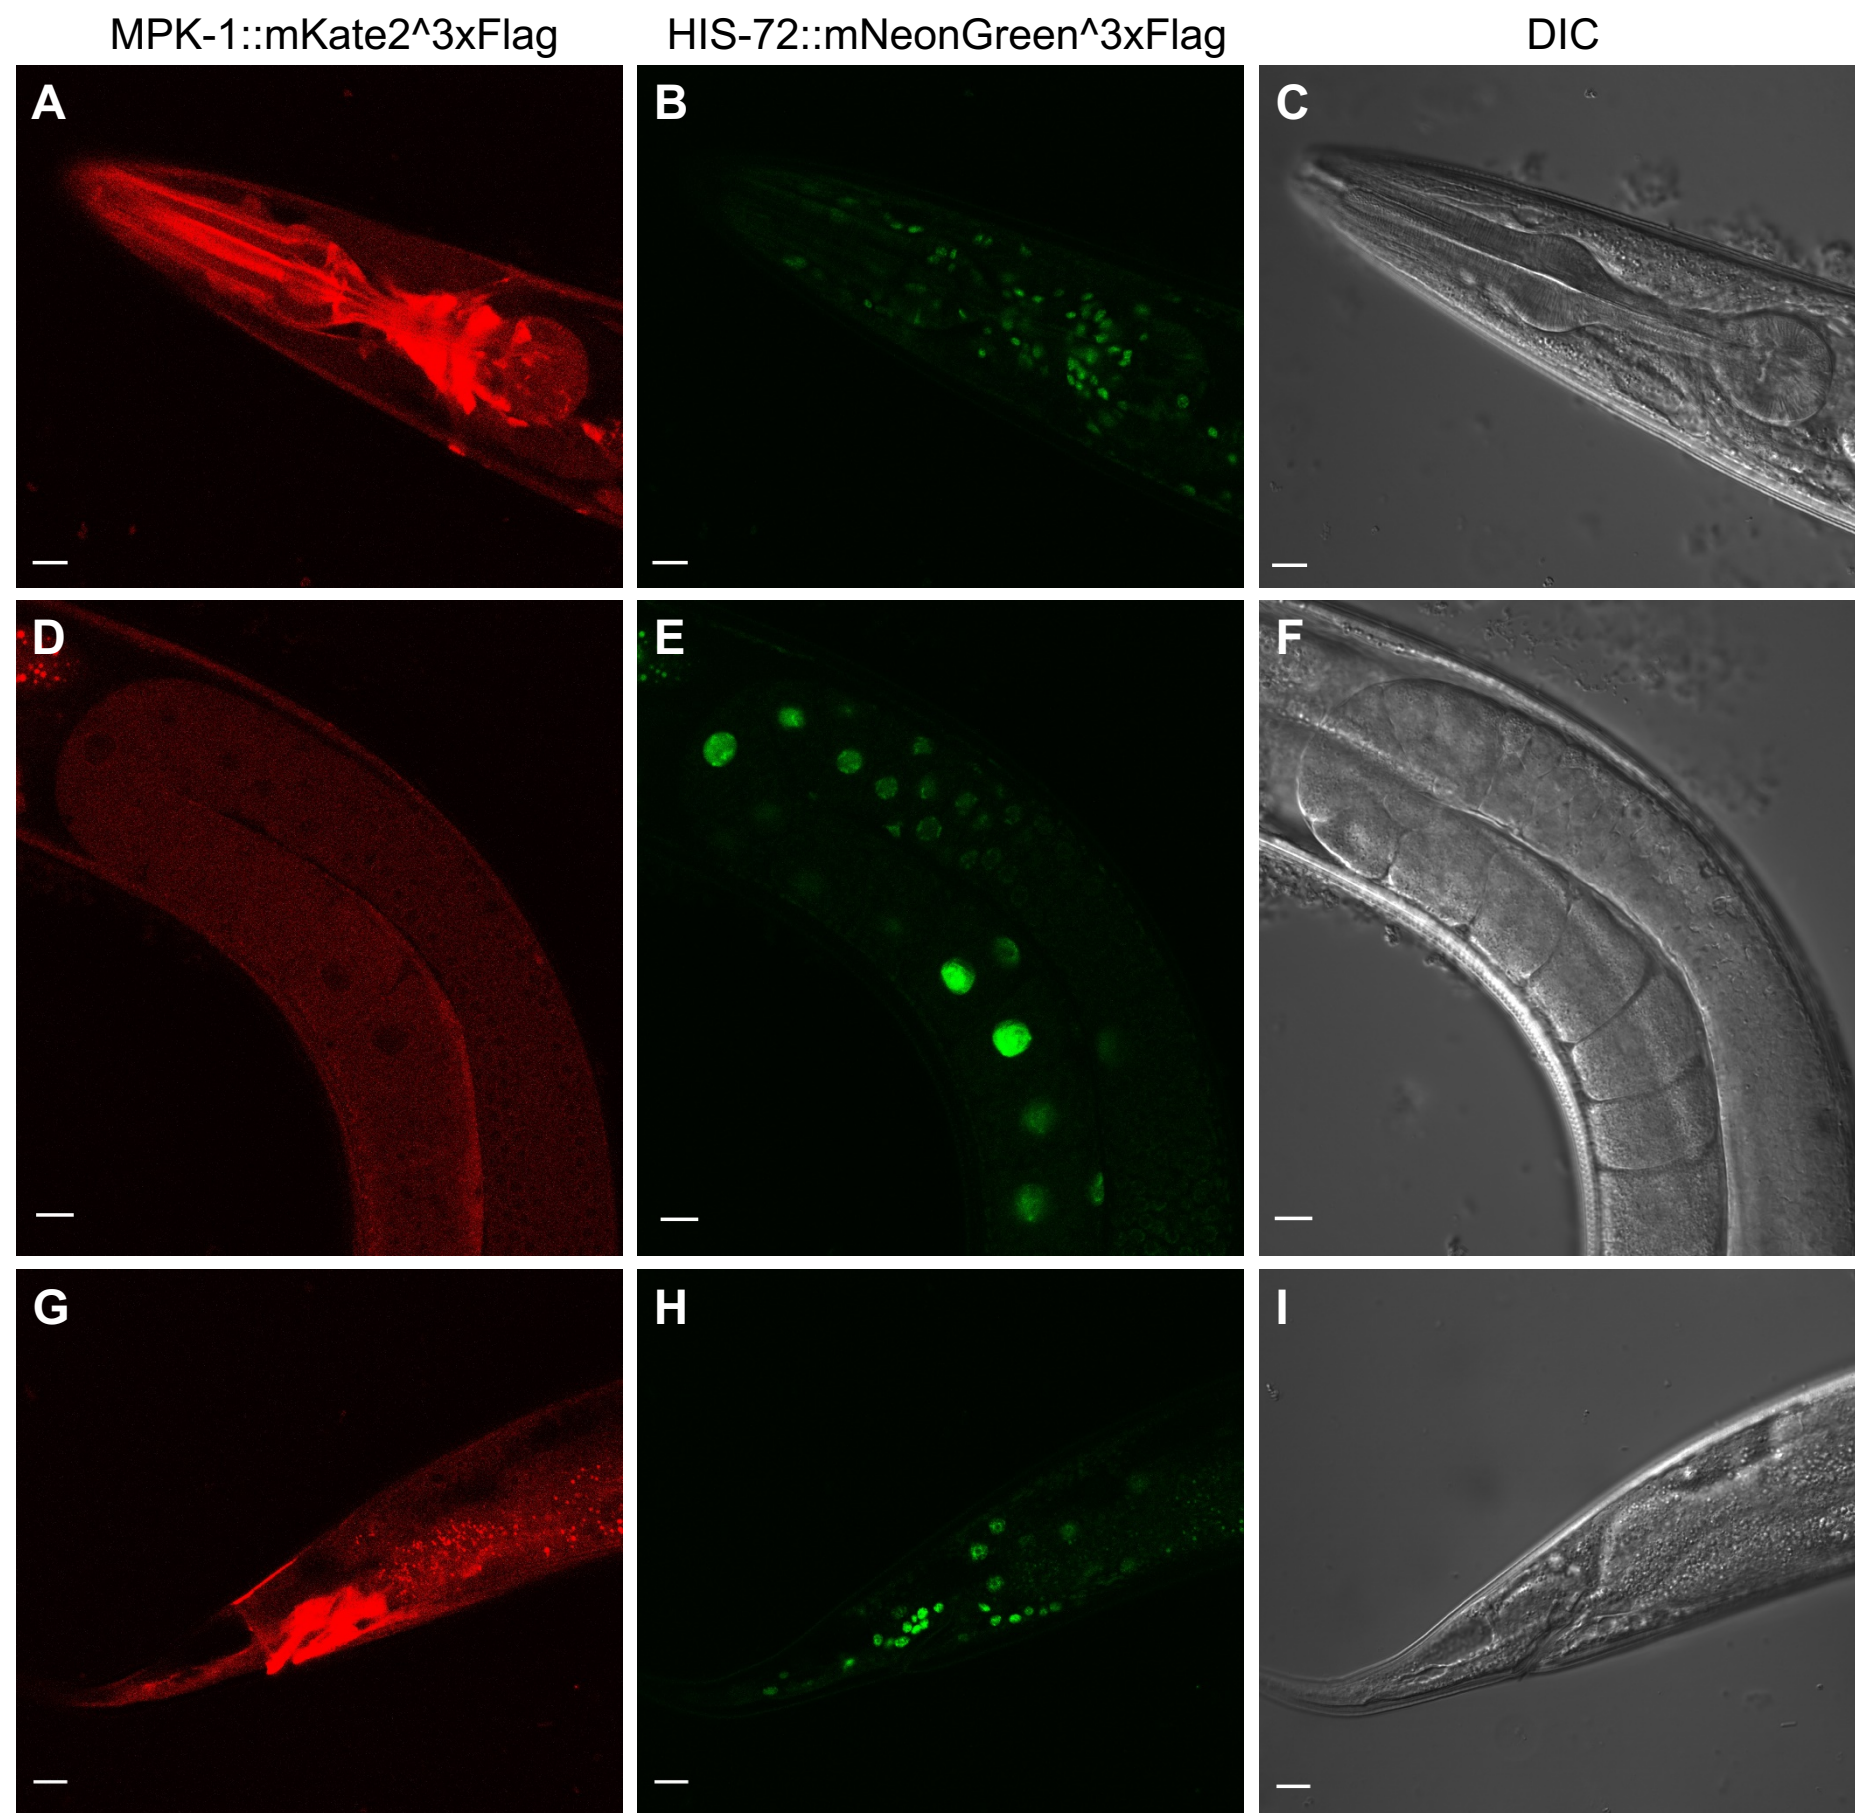



# Rasmussen Figure 4

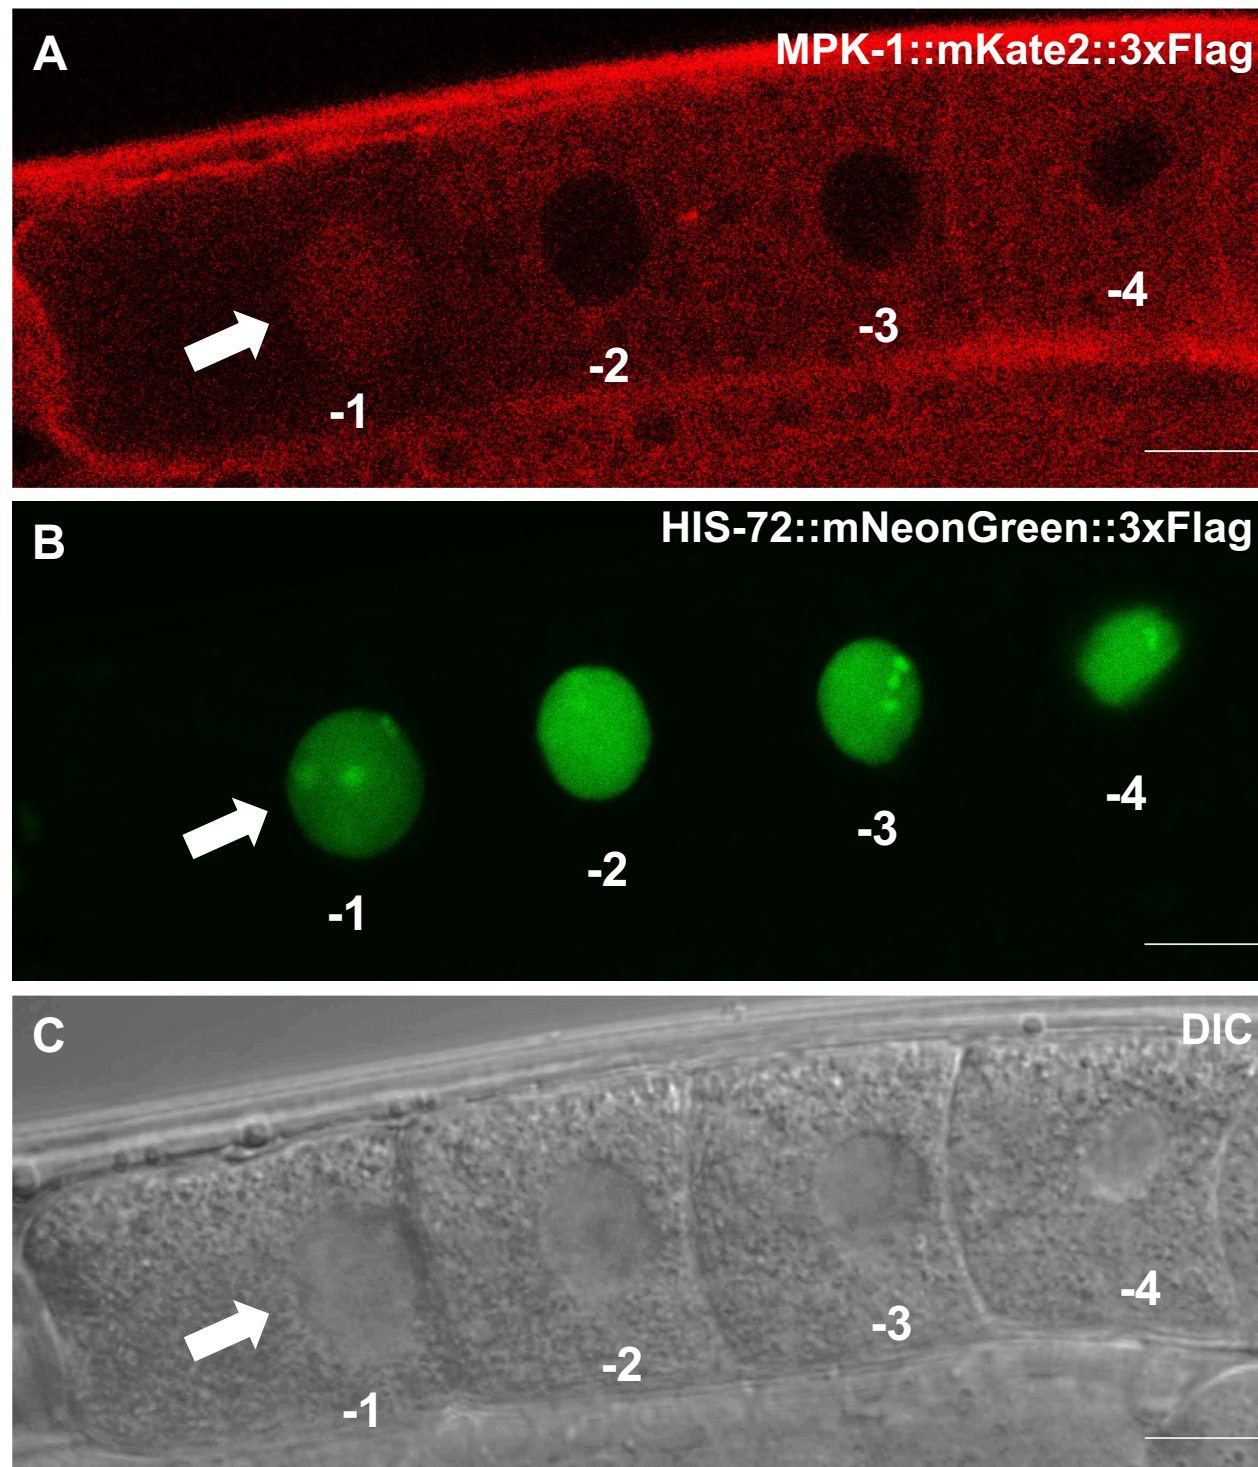





# Rasmussen Figure 6

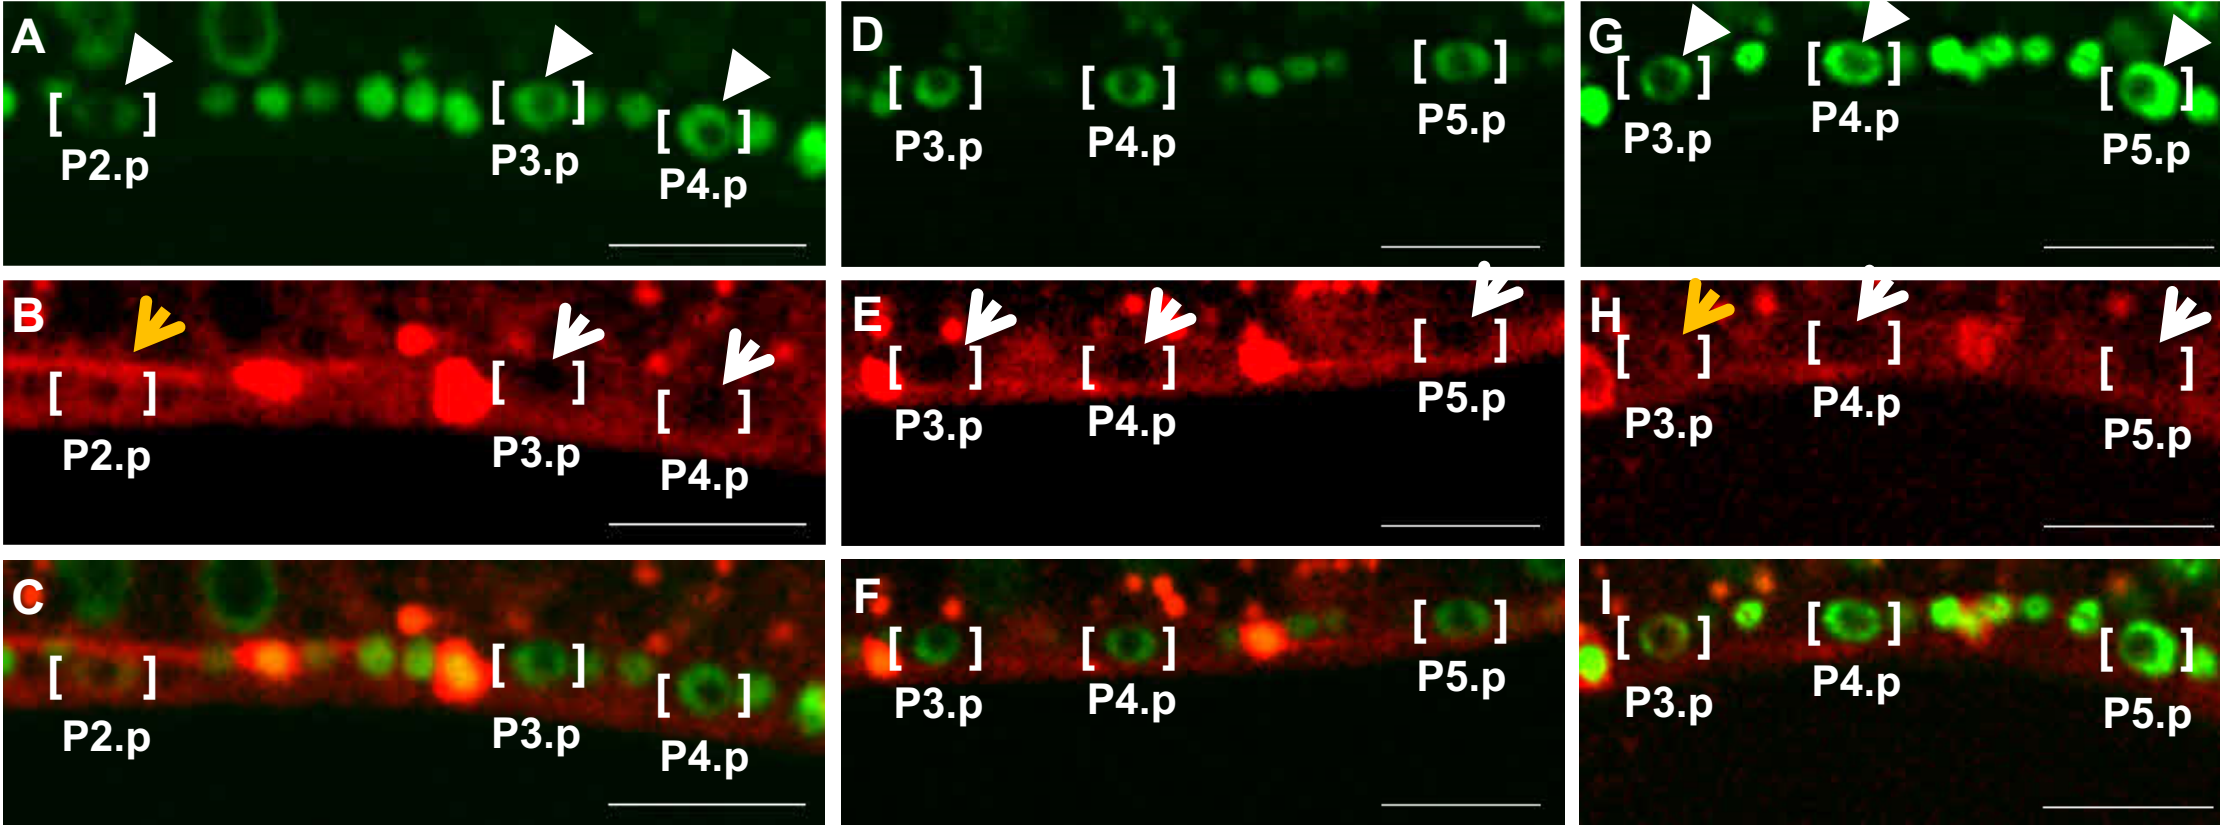

# Rasmussen Figure 7

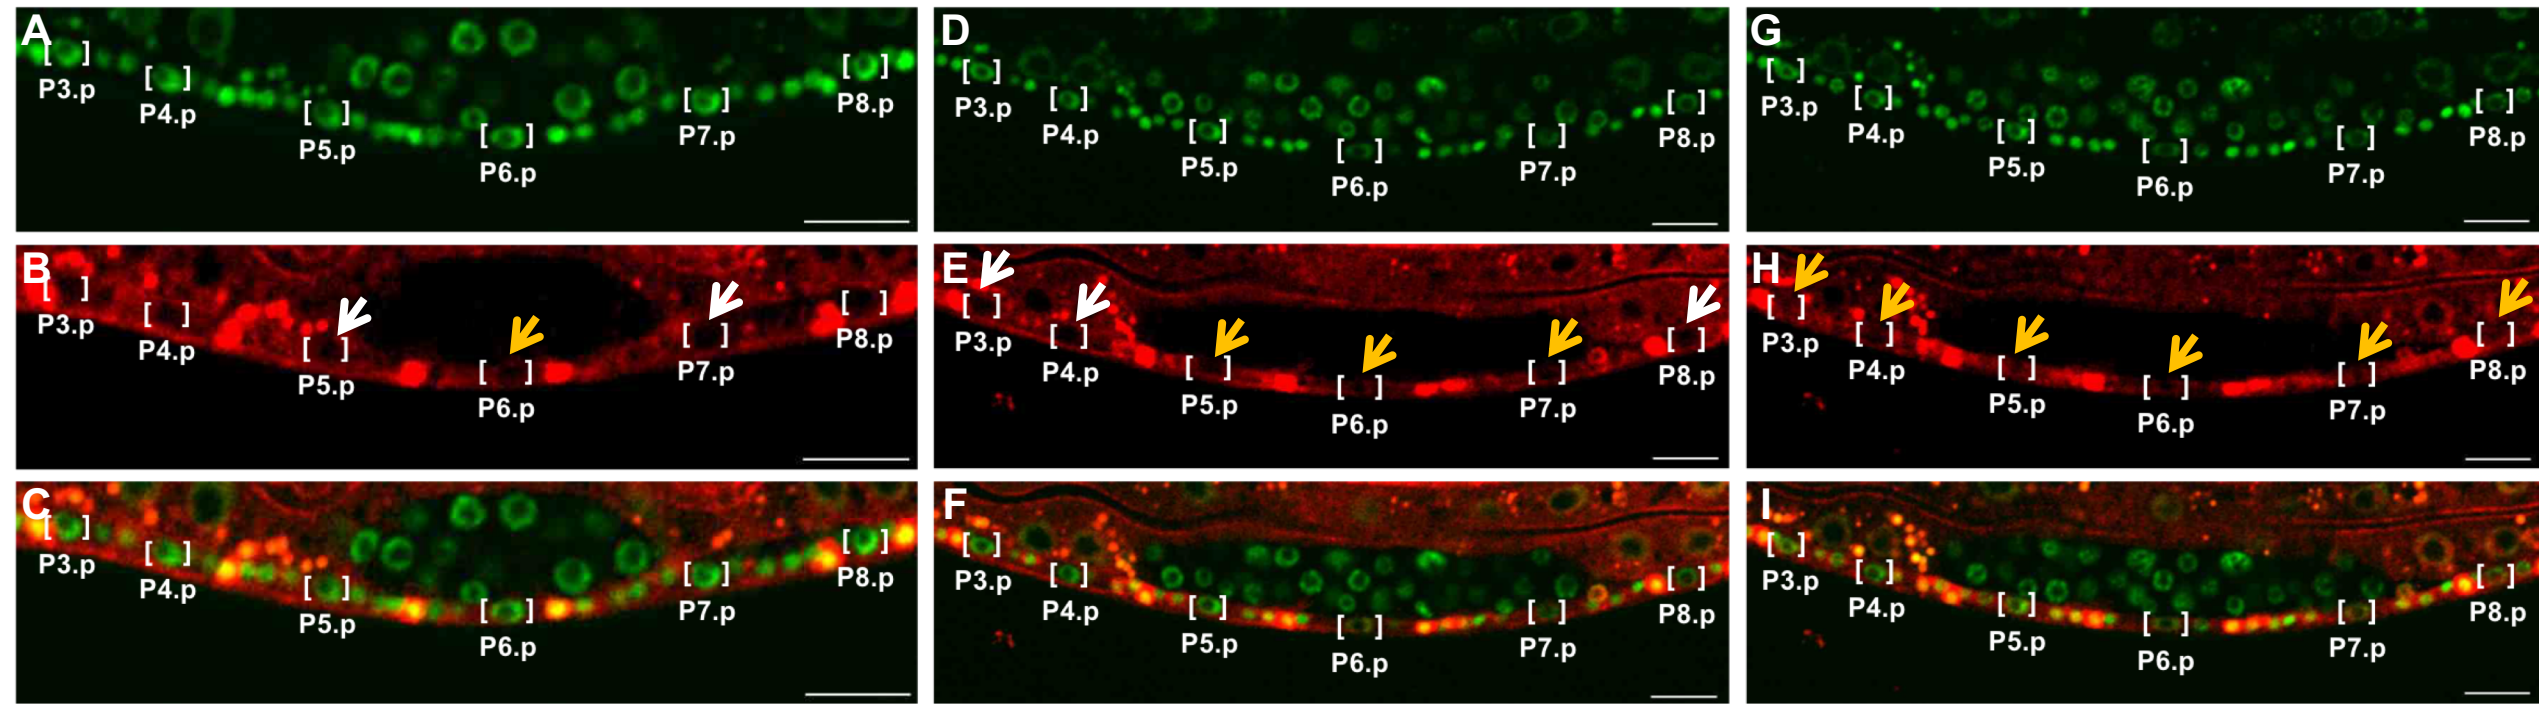



# Rasmussen Figure 8

**A**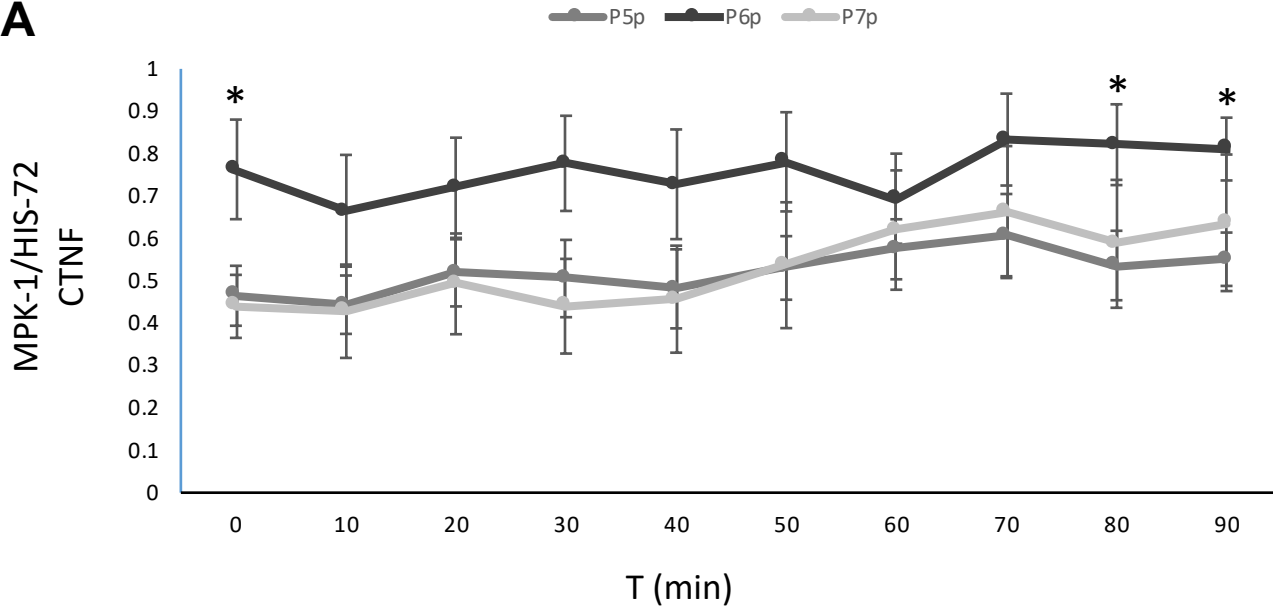**B**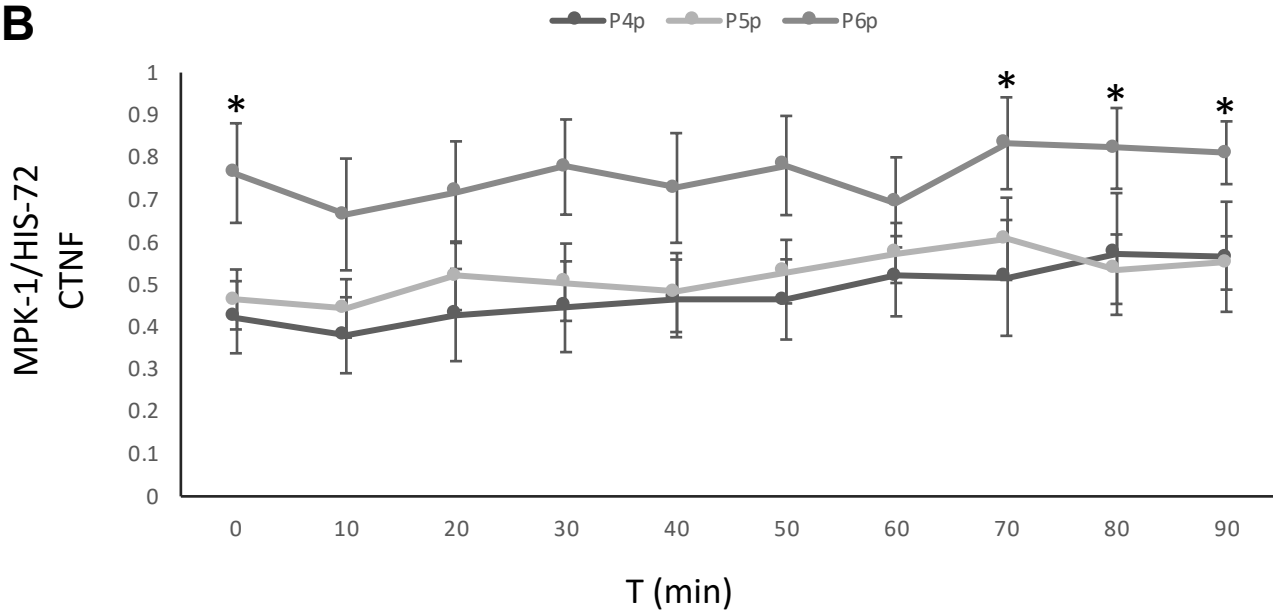

Source: https://www.biorxiv.org/content/biorxiv/early/2021/01/23/2021.01.22.427875.full.pdf
